1                                   **4q-D4Z4 chromatin architecture regulates the transcription**  
2                                   **of muscle atrophic genes in FSHD**

3  
4 Alice Cortesi<sup>1-</sup>, Matthieu Pesant<sup>1-</sup>, Shruti Sinha<sup>1-</sup>, Federica Marasca<sup>1</sup>, Eleonora Sala<sup>1</sup>, Francesco  
5 Gregoretti<sup>2</sup>, Laura Antonelli<sup>2</sup>, Gennaro Oliva<sup>2</sup>, Chiara Chiereghin<sup>3,4</sup>, Giulia Soldà<sup>3,4</sup>, and Beatrice  
6 Bodega<sup>1\*</sup>.

7  
8 (1) Istituto Nazionale di Genetica Molecolare "Romeo ed Enrica Invernizzi" (INGM), Milan, Italy

9 (2) CNR Institute for High Performance Computing and Networking (ICAR), Naples, Italy

10 (3) Department of Biomedical Sciences, Humanitas University, Pieve Emanuele, Milan, Italy

11 (4) Humanitas Clinical and Research Center, Rozzano, Milan, Italy

12

13 (□) These authors contributed equally to this work

14

15 (\*) Correspondence should be addressed to B.B. [bodega@ingm.org](mailto:bodega@ingm.org), phone: +39 02 00660302

16

17 *Running title:* 4q-D4Z4 chromatin architecture is impaired in FSHD

18 *Keywords:* DNA repeats, 3D genome organization, D4Z4, FSHD

19 **Abstract**

20 Despite increasing insights in genome structure organization, the role of DNA repetitive elements,  
21 accounting for more than two thirds of the human genome, remains elusive. Facioscapulohumeral  
22 Dystrophy (FSHD) is associated with deletion of D4Z4 repeat array below 11 units at 4q35.2. It is  
23 known that the deletion alters chromatin structure *in cis*, leading to genes upregulation. Here we  
24 show a genome-wide role of 4q-D4Z4 array in modulating gene expression via 3D nuclear  
25 contacts. We have developed an integrated strategy of 4q-D4Z4 specific 4C-seq and chromatin  
26 segmentation analyses, showing that 4q-D4Z4 3D interactome and chromatin states of interacting  
27 genes are impaired in FSHD1 condition; in particular, genes which have lost the 4q-D4Z4  
28 interaction and with a more active chromatin state are enriched for muscle atrophy transcriptional  
29 signature. Expression level of these genes is restored by the interaction with an ectopic 4q-D4Z4  
30 array, suggesting that the repeat directly modulates the transcription of contacted targets.  
31 Of note, the upregulation of atrophic genes is a common feature of several FSHD1 and FSHD2  
32 patients, indicating that we have identified a core set of deregulated genes involved in FSHD  
33 pathophysiology.

34 **Introduction**

35 Among primate specific macrosatellites, D4Z4 is a 3.3 Kb unit tandem repeat duplicated on several  
36 chromosomes (Bakker et al. 1995; Deidda et al. 1995; Lyle et al. 1995; Bodega et al. 2006;  
37 Bodega et al. 2007), and in particular present as a polymorphic array of 11 to 100-150 copies at  
38 4q35.2 (4q-D4Z4 array) in the general population (Hewitt et al. 1994). Reduction of 4q-D4Z4 array  
39 copy number below 11 units is associated with Facioscapulohumeral Dystrophy (FSHD,  
40 MIM158900; (van Deutekom et al. 1993)), one of the most common myopathies in humans with an  
41 overall prevalence of more than 1:10,000 (Sacconi et al. 2015). FSHD is characterized by  
42 progressive, often asymmetric, weakness and wasting of facial (facio), shoulder and upper arm  
43 (scapulohumeral) muscles (Tawil and Van Der Maarel 2006), where fiber necrosis and  
44 degeneration give rise to muscle atrophy (Sacconi et al. 2015).

45 FSHD is a genetically variable disorder, mainly transmitted as an autosomal dominant trait, on a  
46 specific FSHD-permissive haplotype of Chromosome 4q, namely 4qA (Lemmers et al. 2002;  
47 Lemmers et al. 2007). This form accounts for approximately 95% of the cases (FSHD1); however,  
48 about 5% of the patients display FSHD lacking D4Z4 array contractions (FSHD2). FSHD2 is  
49 caused by mutations in *SMCHD1*, a member of the condensin/cohesin chromatin compaction  
50 complexes, that binds to the D4Z4 repeat array (Lemmers et al. 2012). While in healthy individuals  
51 the 4q-D4Z4 array is characterized by highly methylated DNA, the contracted allele in FSHD1 and  
52 both the 4q-D4Z4 alleles in FSHD2 are hypomethylated (van Overveld et al. 2003; de Greef et al.  
53 2009).

54 The highly heterogeneous FSHD clinical features suggest a strong epigenetic contribution to the  
55 pathology (Tawil et al. 1993; Cabisianca and Gabellini 2010; Neguembor and Gabellini 2010;  
56 Lanzuolo 2012; Daxinger et al. 2015). It is described that the 4q-D4Z4 array is able to engage  
57 short- and long-range genomic contacts with several genes *in cis* (Petrov et al. 2006; Bodega et al.  
58 2009; Himeda et al. 2014; Robin et al. 2015), concomitantly to the Polycomb group (PcG) protein  
59 binding and histone deacetylation, resulting in an overall chromatin compaction. Instead, in FSHD1  
60 condition such interactions are lost, with the consequent alteration of the chromatin structure at the  
61 FSHD locus, leading to a more active chromatin state, which is responsible for the de-repression of

62 the genes *in cis* (Gabellini et al. 2002; Jiang et al. 2003; Bodega et al. 2009; Zeng et al. 2009;  
63 Cabianca et al. 2012). In particular, one of the major player in FSHD pathogenesis is the  
64 transcription factor *DUX4*, encoded from the most telomeric D4Z4 repeat (Gabriels et al. 1999;  
65 Dixit et al. 2007; Lemmers et al. 2010); *DUX4* is normally silenced in somatic cells (Snider et al.  
66 2010), but it has been found overexpressed in FSHD patients' myotubes, leading to the activation  
67 of genes associated with RNA metabolism processes, stem cell and germ-line development,  
68 MERVL/HERVL retrotransposons (Geng et al. 2012; Young et al. 2013; Rickard et al. 2015;  
69 Hendrickson et al. 2017) and resulting in the induction of toxicity and apoptosis of muscle cells  
70 (Bosnakovski et al. 2008; Block et al. 2013).

71 Besides the established role of 4q-D4Z4 array in modulating the transcription of *in cis* genes,  
72 whether the repeat could also directly affect chromatin structure and gene expression of other loci  
73 via 3D physical contacts has not been investigated yet. Therefore, we have explored the 4q-D4Z4  
74 chromatin architecture and possible alterations in FSHD.

75 **Results**

76 **4q-specific D4Z4 interactome is deregulated in FSHD1 patients**

77 Given the high duplication and sequence similarity of 4q35.2 with multiple regions of the genome,  
78 in particular with 10q26.3 (Bodega et al. 2006; Bodega et al. 2007), we designed a 4q-specific 4C-  
79 seq (circular chromosome conformation capture sequencing) strategy to investigate its  
80 interactome. As 4C viewpoint (VP) we used the region nearby a single sequence length  
81 polymorphism (SSLP), present shortly upstream (almost 3.5 Kb) of the first D4Z4 repeat on 4q  
82 (4qA and 4qB) and 10q arrays (Lemmers et al. 2007); we performed paired-end sequencing, that  
83 allowed to retrieve the information of the SSLP variant (Read 1) and the interacting region (Read  
84 2), assigning with high precision the allele origin of the D4Z4 interactome (Supplemental Fig. S1;  
85 Supplemental Table S1; see Methods and Supplemental Methods).

86 With this approach, we probed the 4q-D4Z4 chromatin conformation in human primary muscle  
87 cells from two FSHD1 patients (FSHD1) and two healthy individuals (CN) (Supplemental Table  
88 S1), that did not differ for myoblast purity and differentiation efficiency (Supplemental Fig. S2). 4C-  
89 seq was performed on myoblasts (MB) to highlight differences that could precede any  
90 transcriptional effect in differentiated cells. Comparative analyses of 4C-seq samples showed high  
91 level of reproducibility and similarity both at the level of donor origin (fragments read count, CN or  
92 FSHD1) (Supplemental Fig. S3) and at the level of viewpoint (called interacting regions, 4q vs 10q)  
93 (Supplemental Fig. S4A,B). We identified 4q-D4Z4 specific *cis* interactions with *FRG1*, *ZFP42*,  
94 *SORBS2* and *FAM149A* genes (Fig. 1A; Supplemental Fig. S4C-E), as already reported (Bodega  
95 et al. 2009; Robin et al. 2015), suggesting that our approach is robust in the detection of 4q-  
96 specific D4Z4 interactions.

97 We retrieved 244 and 258 4q-D4Z4 interacting regions for CN and FSHD1 respectively, and in  
98 particular, among them, 175 for CN and 181 for FSHD1 were *trans* interactions. Interestingly, 116  
99 regions interacting in CN were specifically lost in FSHD1 cells and the vast majority (101) were in  
100 *trans* (Fig. 1A; Supplemental Table S2).

101 3D multicolor DNA FISH was performed on the same and additional CN and FSHD1 donor MB to  
102 validate 4C results, using a probe on a not duplicated region in 4q35.1 (Supplemental Fig. S5A;

103 (Tam et al. 2004)), and a probe for a positive (C+) or negative (C-) 4q-D4Z4 interacting region (Fig.  
104 1B; Supplemental Fig. S5B). We developed a novel algorithm (NuCL $\epsilon$ D, Nuclear Contacts Locator  
105 in 3D, see Supplemental Methods) to automatically detect and localize fluorescent spots in 3D  
106 reconstructed nuclei. We observed that 4q/C+ interaction had higher frequency of contacts and  
107 higher number of positive interacting nuclei compared to 4q/C- interaction (Fig. 1C,D;  
108 Supplemental Table S3), with contact frequencies in the range of those estimated for long range  
109 interactions (10-20%, (Finn et al. 2019)). Furthermore, 4q and C+ regions shared the same  
110 topological nuclear domain in both CN and FSHD1, whereas 4q and C- did not (Supplemental Fig.  
111 S5C,D; Supplemental Table S3). Same results were obtained in CN and FSHD1 myotubes (MT)  
112 (Supplemental Fig. S5E-G; Supplemental Table S3). Additionally, with our 4C-seq approach we  
113 were also able to retrieve 4q allele specific interactomes (4qA and 4qB), as well as 10q-D4Z4  
114 interactome (Supplemental Fig. S6; Supplemental Table S2; see Supplemental Material).  
115 Overall, the 4q-D4Z4-4C-seq strategy allowed to map genome-wide 4q-D4Z4 contacts and to  
116 highlight those deregulated in FSHD1.

117

118 **Genes that show impaired 4q-D4Z4 interactions and activated chromatin state are enriched**  
119 **for atrophic transcriptional signature**

120 In order to identify novel deregulated genes specific for the FSHD condition, we derived chromatin  
121 state changes in FSHD1 cells and intersected with 4q-D4Z4 lost interactions in FSHD1, retrieving  
122 genes altered both at structural and chromatin levels.

123 To define the chromatin state, we generated or used available (ENCODE) ChIP-seq datasets for  
124 H3K36me3, H3K4me1, H3K27ac, H3K4me3 and H3K27me3 in CN and FSHD1 MB and MT  
125 (Supplemental Fig. S7A,B). The quality of ChIP-seq was validated on the same and additional CN  
126 and FSHD1 donors MB and MT (Supplemental Fig. S7C-H). Next, we identified 15 chromatin  
127 states using ChromHMM (Ernst and Kellis 2012), that were adopted for further downstream  
128 analyses (Fig. 2A; Supplemental Fig. S8A,B). Interestingly, chromatin segmentation analysis  
129 revealed transitions at enhancers and promoters distinctive for FSHD1 cells (Supplemental Fig.  
130 S8C; see Supplemental Material).

131 In order to identify the genes that specifically switched to activated or repressed chromatin state in  
132 FSHD1, we designed the strategy shown in Fig. 2B. Activated genes were defined as those that  
133 showed a transition towards a more active state (considering the coverage of the gene body,  
134 promoter and enhancer regions) and repressed genes those that showed an opposite change (Fig.  
135 2B; Supplemental Table S4; see Methods). To verify the reliability of this approach, we inspected  
136 the expression level of these genes by analyzing RNA-seq datasets performed on the  
137 corresponding cell lines and additional publicly-available RNA-seq datasets (Yao et al. 2014).  
138 Notably, the activated or repressed chromatin state switches were associated with higher or lower  
139 mRNA expression levels, respectively, in FSHD1 compared to CN (Fig. 2C; Supplemental Table  
140 S4).

141 We next sought genes that had lost the interaction with 4q-D4Z4 and also showed chromatin  
142 deregulation in FSHD1. We observed that 28% (450/1614) of genes that had lost contact with 4q-  
143 D4Z4 in FSHD1 were mainly activated (FSHD1 lost-activated genes, 71%, 319/450), whereas a  
144 minority of them (FSHD1 lost-repressed genes, 29%, 131/450) were repressed (Fig. 3A;  
145 Supplemental Fig. S9A-C; Supplemental Table S5; see Supplemental Material). Interestingly, only  
146 few of these FSHD1 altered genes were regulated by DUX4 (Supplemental Fig. S9D;  
147 Supplemental Fig. S10; see Supplemental Material).

148 We performed Gene Ontology (GO) analyses on the FSHD1 altered genes and found that FSHD1  
149 lost-activated genes were enriched in GO terms linked to protein catabolic processes and in  
150 particular with protein ubiquitination/degradation pathways (Fig. 3B; Supplemental Table S5), that  
151 are highly relevant to the FSHD-associated atrophic phenotype (Tawil and Van Der Maarel 2006;  
152 Sacconi et al. 2015; Statland and Tawil 2016). Similar analysis on 10q-D4Z4 FSHD1 altered genes  
153 did not reveal GO terms related to atrophy (Supplemental Fig. S11A,B).

154 Indeed, we executed Gene Set Enrichment Analysis (GSEA) and further demonstrated that 4q-  
155 D4Z4 specific lost-activated genes in FSHD1 were enriched for genes upregulated in the atrophic  
156 condition (Fig. 3C; Supplemental Fig. S11C-E; Supplemental Table S5). Of note, the FSHD1 lost-  
157 activated genes included in the atrophic dataset displayed higher expression level both in several  
158 FSHD1 (Fig. 3D) as well as FSHD2 (Fig. 3E) RNA-seq datasets, revealing that the epigenetic and

159 transcriptional deregulation of this core set of genes represents a novel transcriptional signature  
160 that is common among different FSHD patients.

161

162 **4q-D4Z4 lost interacting *FBXO32/ATROGIN1* gene is deregulated in FSHD patients at**  
163 **chromatin and transcriptional level**

164 To finely dissect how the 4q-D4Z4 lost interactions could influence the upregulation of muscle  
165 atrophy genes in FSHD1 condition, we further investigated the regulation of *FBXO32 (ATROGIN1)*,  
166 that is one of the top-enriched genes identified by GSEA, and also one of the major player in  
167 different atrophy related conditions, in human and mouse (Gomes et al. 2001; Lecker et al. 2004;  
168 Sandri et al. 2004; Bodine and Baehr 2014). We verified by 3D multicolor DNA FISH the loss of  
169 *FBXO32/4q-D4Z4* interaction on several FSHD1 donors compared to CN, extending our analysis  
170 also to FSHD2 (Fig. 4A; Supplemental Fig. S12A,B), and observed a decrease in *FBXO32/4q-*  
171 *D4Z4* interaction frequency in FSHD1, but also in FSHD2 myoblasts (Fig. 4B,C; Supplemental  
172 Table S3). Similar results were obtained in FSHD1 myotubes, although with a smaller difference  
173 (Supplemental Fig. S12C-E; Supplemental Table S3).

174 *FBXO32* belongs to the category of activated genes in FSHD1, with the appearance of primed  
175 enhancers specifically in FSHD1 condition (Fig. 2B; Supplemental Fig. S13A; Supplemental Table  
176 S4). Therefore, we further investigated whether the *FBXO32* locus could display distinct chromatin  
177 loops at the level of enhancers-promoter in FSHD1. We performed 4C-seq (Fig. 4D; Supplemental  
178 Fig. S13B-D; Supplemental Table S1 and S2), showing interaction peaks between enhancers-  
179 promoter with higher normalized 4C reads coverage in FSHD1 (Fig. 4E;). These results were  
180 further corroborated in 3C experiments (Fig. 4E), suggesting a strengthening of enhancers-  
181 promoter contacts at *FBXO32* locus in FSHD1 cells.

182 In line with this observation, the binding of RNA Pol II at *FBXO32* promoter and an intragenic  
183 region was increased in FSHD1 myoblasts respect to CN (Fig. 4F; Supplemental Fig. S14A) and  
184 the *FBXO32* expression was upregulated in several FSHD1 donor muscle cells during  
185 differentiation, a trend that is also observed in FSHD2 (Fig. 4G). Finally, the *FBOX32* expression is  
186 not dependent by DUX4, as it is not affected by DUX4 overexpression (Supplemental Fig. S14B-D;



187 see Supplemental Material), and ChIP-seq peaks (Geng et al. 2012) are absent in the *FBXO32*  
188 gene region (Supplemental Fig. S14E).

189

### 190 **Ectopic 4q-D4Z4 array restores the expression of FSHD1 lost interacting genes**

191 To further investigate whether 4q-D4Z4 array could directly modulate the expression of interacting  
192 genes, we transfected CN and FSHD1 myoblasts with a BAC containing at least 15 D4Z4 repeat  
193 units (B Bodega, unpublished) (BAC 4q-D4Z4n from 4q35.2 region) in parallel with a control BAC  
194 (Ctrl BAC, unrelated and not interacting region); transfection efficiency was comparable among the  
195 BACs and ranging around 45% (Supplemental Fig. S14F-H; see Supplemental Methods).

196 We observed that specifically the ectopic 4q-D4Z4 array was in close spatial proximity to the  
197 endogenous 4q region, in 70% of the analyzed nuclei (Fig. 5A,B) and interacted with *FBXO32* with  
198 a frequency similar as that of the endogenous locus (roughly 20% of analyzed nuclei, Fig. 5C),  
199 indicating that the 4q-D4Z4 BAC occupies the same nuclear topological domain of the endogenous  
200 4q region. We then assessed the effect of 4q-D4Z4 BAC transfection on the expression levels of a  
201 subset of genes that had lost 4q-D4Z4 interactions in FSHD1. We observed that the transcription  
202 of FSHD1 lost-activated genes was reduced (*FBXO32*, *TRIB3* and *ZNF555*; Fig. 5D), whereas a  
203 lost-repressed gene was upregulated (*LZTS3*; Fig. 5E) and no effect was detected for not  
204 interacting genes (*FOXO3* and *MYOG*; Fig. 5F).

205 Collectively, these results demonstrate that the 4q-D4Z4 array directly modulates the transcription  
206 of its interacting targets, suggesting a simultaneous fine-tuning of genes that occupy the same  
207 topological domain.

208 **Discussion**

209 Here, we sought to identify the mechanisms by which the contraction of the tandem repeat D4Z4  
210 on Chromosome 4 contributes to FSHD pathogenesis, using an integrated multi-omics approach  
211 (4C-seq, ChIP-seq and RNA-seq).

212 We found that 4q-D4Z4 interactome is altered in FSHD1 patients. In particular, normal 4q-D4Z4  
213 array contacts several regions in a peripheral nuclear domain, controlling their transcription (Fig.  
214 6A). In FSHD1 patients, the shortened and hypomethylated 4q-D4Z4 array causes an impairment  
215 of the chromatin conformation, which results in the loss of contacts with atrophic genes, with their  
216 consequent chromatin structure alteration and transcriptional upregulation (Fig. 6B). In this regard,  
217 it is already demonstrated that chromatin topological structures predominantly consist of  
218 simultaneous multiplex chromatin interactions with high heterogeneity between individual cells  
219 (Jiang et al. 2016; Zheng et al. 2019). Indeed, we show that an ectopic wild type 4q-D4Z4 array  
220 has the ability to get in close spatial proximity to the endogenous locus, resulting in the restoration  
221 of the expression of multiple targets, opening the possibility for further mechanistic studies on the  
222 dynamics of 3D interactions.

223 We propose that the genetic deletion of 4q-D4Z4 array in FSHD1 patients leads to a rewired  
224 interactome that may represent an additional component of FSHD pathophysiology.

225 Since we discovered that the subset of genes losing contact with the 4q-D4Z4 array in FSHD1  
226 mainly show chromatin state switches towards activation, we hypothesize that this might be  
227 consistent with a broader derepression occurring at the 4q-D4Z4 array, such as lesser PRC1/2  
228 recruitment together or not with an enhanced activity of Trithorax complex, as already  
229 demonstrated *in cis* (Cabianca et al. 2012). Of note, SMCHD1 protein, mutated in FSHD2 patients  
230 (Lemmers et al. 2012), is now better characterized and involved in higher order chromatin  
231 organization of the inactive X Chromosome (Jansz et al. 2018; Wang et al. 2018). We could  
232 hypothesize that this architectural protein could have a central role in regulating 4q-D4Z4  
233 interactions and that its altered function in FSHD1 (due to the contraction and hypomethylation of  
234 the array) and FSHD2 patients (due to its mutation) could explain the common atrophic signature.  
235 Indeed, FSHD-associated atrophy is one of the main signs of the disease (Tawil and Van Der

236 Maarel 2006; Lanzuolo 2012; Sacconi et al. 2015), for which a direct link with the genetic defect  
237 remained elusive till now.

238 Importantly, we identified a core set of impaired atrophic genes, which is aberrantly transcribed in  
239 FSHD1 muscle cells used in this study and in other FSHD1 cells (Yao et al. 2014). Furthermore,  
240 they are also deregulated in FSHD2 muscle cells, indicating that the atrophic signature is a  
241 common trait in FSHD pathology. We further investigated *FBXO32* gene regulation, which was one  
242 of the top ranking; although it was already described overexpressed in muscle biopsies derived  
243 from FSHD1 fetuses and adults (Broucqsault et al. 2013), here we linked its transcriptional  
244 deregulation to the reduction in *FBXO32/4q-D4Z4* interaction. This was predominantly observed in  
245 FSHD myoblasts compared to myotubes, in line with previous reports that changes in 3D structure  
246 precedes changes in gene expression (Hug et al. 2017; Krijger and de Laat 2017; Cheutin and  
247 Cavalli 2018) and already demonstrated also for *FRG1* gene (Bodega et al., 2009).

248 DNA repetitive elements are involved in a plethora of regulatory mechanisms, such as nuclear  
249 structure organization and spatiotemporal gene expression regulation (Gregory 2005; de Laat and  
250 Duboule 2013; Bodega and Orlando 2014). Additionally, recent studies have highlighted the  
251 contribution of satellite repeats in shaping 3D-genome folding and function, as evidenced for  
252 pericentromeric satellites (Politz et al. 2013; Wijchers et al. 2015) and DXZ4 macrosatellite  
253 (Giacalone et al. 1992; Rao et al. 2014; Deng et al. 2015; Darrow et al. 2016; Giorgetti et al. 2016).  
254 Our study is the first demonstration of a role of DNA repetitive elements in the alteration of  
255 genomic architecture in the context of a human genetic disease. It further corroborates the concept  
256 that perturbations of the 3D-genome structure are involved in various diseases (Krijger and de Laat  
257 2016; Lupianez et al. 2016), such as cancers (Corces and Corces 2016; Rivera-Reyes et al. 2016;  
258 Achinger-Kawecka and Clark 2017) and developmental defects (Woltering et al. 2014; Lupianez et  
259 al. 2015; Woltering and Duboule 2015).

260 Our work highlights a novel role of DNA repeats in orchestrating gene transcription by shaping 3D  
261 genomic and chromatin architecture. We propose that perturbation of this DNA repeat-mediated  
262 regulatory network may be important in other complex genetic and epigenetic diseases.

263 **Methods**

264 **Cell cultures**

265 Although it was not always possible to ascertain the status of the muscle origin used in this study  
266 (see Supplemental Table S1, sheet “Cell line information”), the majority of the cells used derived  
267 from quadriceps, which in general was asymptomatic. Human primary myoblast cell lines from  
268 healthy donors (CN), patients affected by FSHD1 or FSHD2 were obtained from the Telethon  
269 BioBank of the C. Besta Neurological Institute, Milan, Italy and the Fields Center for FSHD of the  
270 Rochester Medical Center Dept. of Neurology, New York, USA; whereas human immortalized  
271 myoblast cell lines from healthy donors and FSHD1 patients were obtained from the University of  
272 Massachusetts Medical School Wellstone center for FSH Muscular Dystrophy Research,  
273 Wellstone Program & Dept. of Cell & Developmental Biology, Worcester, MA USA. Details of all  
274 cell lines are reported in Supplemental Table S1; details on media preparation and FACS analysis  
275 for Desmin staining are provided in Supplemental Methods.

276

277 **4C-seq assay**

278 The 4C assay was performed as previously described (Splinter et al. 2012) with minor  
279 modifications. A paired-end 4q-D4Z4-specific 4C-sequencing strategy was developed, where one  
280 4C primer was designed to read the single sequence length polymorphism (SSLP) sequences  
281 located shortly upstream (almost 3.5 Kb) of the first D4Z4 repeat on 4q or 10q-D4Z4 arrays  
282 (Lemmers et al. 2007) and the second 4C primer reads into the captured sequence ligated to the  
283 ‘bait’ fragment. (Supplemental Fig. S1; Supplemental Table S1). Two donor muscle cell lines of CN  
284 (CN-3, CN-4) and FSHD1 (FSHD1-3, FSHD1-4) human primary myoblasts ( $3.5 \times 10^6$  per sample)  
285 nuclei were processed. Five biological replicates (start to finish experiments) for each cell line were  
286 performed (Supplemental Fig. 3A). For *FBXO32* 4C-seq, we designed specific 4C primers as  
287 indicated in Supplemental Table S1. Two donor muscle cell lines of CN (CN-3, CN-4) and FSHD1  
288 (FSHD1-3, FSHD1-4) human primary myoblasts ( $3.5 \times 10^6$  per sample) nuclei were processed.  
289 From one to two biological replicates (start to finish experiments) for each cell line were performed.  
290 Hind III and Dpn II were used for enzymatic digestions. 4C samples were amplified using the bait

291 and the SSLP specific primers. 4C sequencing libraries were prepared with 4C templates using the  
292 NEBNext Ultra DNA Library Prep Kit for Illumina, according to the manufacturer's protocol, cleaned  
293 with Agencourt AMPure XP PCR Purification and sequenced on the Illumina NextSeq 500. For  
294 more details, see Supplemental Methods.

295

#### 296 **4C-Seq analysis**

297 The paired-end 4q-D4Z4-specific 4C-seq reads were de-multiplexed based on the 4C bait reading  
298 primer that included the restriction site sequence. All reads were then trimmed and read pairs  
299 belonging to 4q-D4Z4, 10q-D4Z4 and 4q alleles were identified using SSLP reading mate (Read 1)  
300 (Supplemental Fig. S1; Supplemental Table S1) where no mismatch for the genotype sequence  
301 was allowed. Read pairs reading into the captured sequences ligated to the bait (Read 2) from the  
302 biological replicates of each donor muscle cell line were then pooled and mapped with Bowtie 2  
303 (Langmead and Salzberg 2012). To find chromosome-wide interacting domains, 4C-ker (Raviram  
304 et al. 2016) was used. Reproducibility between donor muscle cell lines and quality of sequencing  
305 were assessed using Pearson correlation and cis/overall ratio (see Supplemental Methods). High  
306 frequency interactions for each viewpoint were intersected using BEDTools v2.2.4 (Quinlan and  
307 Hall 2010) and overlapping regions between donor muscle cell lines (CN-3 vs CN-4 and FSHD1-3  
308 vs FSHD1-4) after removing overhangs were considered as high-confidence interacting domains.  
309 The interacting genes were defined as those that fall within the coordinates of these domains.  
310 Comparative analyses were performed between the 4q-D4Z4 alleles interactomes and also  
311 between the 4q and 10q-D4Z4 interactomes (see Supplemental Methods).

312 The paired-end *FBXO32* 4C-seq reads were demultiplexed based on the 4C bait reading primer  
313 that includes the restriction site sequence. All reads were trimmed and reads from the biological  
314 replicates of each donor muscle cell line were pooled and then mapped with Bowtie 2 (Langmead  
315 and Salzberg 2012). Reproducibility between donor muscle cell lines and quality of sequencing  
316 were assessed using Pearson correlation and cis/overall ratio. *Cis*-interacting domains were  
317 identified using 4C-ker (Raviram et al. 2016) and high-confidence interacting domains were

318 selected. Full lists of interactions are available in Supplemental Table S2. For more details, see  
319 Supplemental Methods.

320

### 321 **ChIP-seq and ChIP-qPCR experiments**

322 ChIP experiments were performed as previously described (Bodega et al. 2017) with minor  
323 modifications. The same donor muscle cell lines used for 4C-seq analysis of CN (CN-3, CN-4) and  
324 FSHD1 (FSHD1-3, FSHD1-4) human primary myoblasts and myotubes day 4 ( $3.5 \times 10^6$  per  
325 sample) were processed for ChIP-seq analysis. For ChIP-seq and ChIP-qPCR, chromatin was  
326 immunoprecipitated with anti-H3K36me3 (ab9050, Abcam), anti-H3K4me1 (07-436, Millipore),  
327 anti-H3K27ac (07-360, Millipore), anti-H3K4me3 (07-473, Millipore) and anti-H3K27me3 (07-449,  
328 Millipore); anti-RNA polymerase II CTD repeat YSPTSPS (phospho S5) antibody [4H8] (ab5408,  
329 Abcam). ChIP sequencing libraries were prepared using the NEBNext Ultra DNA Library Prep Kit  
330 for Illumina, according to the manufacturer's protocol, cleaned with Agencourt AMPure XP PCR  
331 Purification and sequenced on the Illumina NextSeq 500 or HiSeq 2000. For ChIP-qPCR  
332 experiments, qRT-PCR analysis was performed on a StepOnePlus Real-Time PCR System, using  
333 power SYBR Green q-PCR master mix. The relative enrichment obtained by using all the  
334 antibodies was quantified after normalization for input chromatin. Primers used are reported in  
335 Supplemental Table S6. For more details, see Supplemental Methods.

336

### 337 **ChIP-seq analysis**

338 We generated ChIP-seq datasets for CN myoblasts (MB) and myotubes (MT) day 4 for the  
339 following histone marks: H3K36me3, H3K4me3 and H3K27me3. H3K36me3, H3K4me1, H3K27ac,  
340 H3K4me3 and H3K27me3 datasets were generated for FSHD1 myoblasts and myotubes day 4.  
341 The following already published ChIP-seq datasets from ENCODE were used: H3K4me1 of human  
342 skeletal myoblasts (ENCSR000ANI), H3K27ac of human skeletal myoblasts (ENCSR000ANF),  
343 H3K4me1 of human skeletal myotubes (ENCSR000ANX) and H3K27ac of human skeletal  
344 myotubes (ENCSR000ANV). Reads were mapped with Bowtie 2 (Langmead and Salzberg 2012)  
345 on quality-checked (FastQC v0.11.2) and trimmed reads (trimmomatic v0.32; (Bolger et al. 2014)).

346 For visualization of ChIP-seq tracks of independent samples, reads were normalized using bins  
347 per million mapped reads (BPM), same as TPM in RNA-seq, and to ensure fair comparison  
348 between all datasets, were further normalized to the respective input to produce coverage files  
349 reporting the  $\log_2$  ratio of normalized read number between samples and inputs using  
350 bamCompare module. Quality and reproducibility assessment were done using deepTools2  
351 package. For more details, see Supplemental Methods. Details on DUX4 ChIP-seq analysis is  
352 provided in Supplemental Methods.

353

### 354 **Chromatin state analysis**

355 We used ChromHMM (Ernst and Kellis 2012) with default parameters to derive genome-wide  
356 chromatin states maps of CN and FSHD1 myoblasts and myotubes. We used the 5 histone marks  
357 H3K36me3, H3K4me1, H3K27ac, H3K4me3 and H3K27me3, as well as the respective input files,  
358 and binarized the data with BinarizeBed. We chose 15 states as the optimal number according to  
359 the maximal informative annotated genomic features and minimal redundancy. Subsequent  
360 functional annotations were attributed to each state choosing names and a color code for  
361 visualization according to the Roadmap Epigenomics Consortium nomenclature (Roadmap  
362 Epigenomics Consortium et al. 2015). Total number of derived chromatin features was similar  
363 between the samples (CN MB: 503,507; FSHD1 MB: 565,653; CN MT: 609,058; FSHD1 MT:  
364 581,946). We performed overlap enrichment of the 15 chromatin states with known genome  
365 organization features (Supplementary Fig. S8A,B) and intersected chromatin states and genes  
366 bodies retrieved from GENCODE version 19 using BEDTools v2.2.4 (Quinlan and Hall 2010).  
367 Calculations of pairwise Jaccard were performed with BEDTools.

368

### 369 **Chromatin state switches analysis**

370 In order to define whether CN and FSHD1 cells showed differences at gene chromatin state level,  
371 we took CN data as reference to search for specific switches in FSHD1. We intersected chromatin  
372 states retrieved from gene bodies in CN MB, CN MT, FSHD1 MB and FSHD1 MT. We postulated  
373 that a given state in a particular condition (CN MB or MT) should intersect another state in the

374 other condition (FSHD1 MB or MT) in a reciprocal manner. We thus performed BEDTools intersect  
375 using `-f .60 -r` thus requiring that at least 60% of a state in CN MB or MT recovered a state in  
376 FSHD1 MB or MT in a reciprocal manner. In this way, identical states in the CN versus FSHD1  
377 comparison (conserved states in the CN/FSHD1 comparison) as well as different states in the CN  
378 versus FSHD1 comparison (switching states in the CN/FSHD1 comparison) were retrieved. We  
379 focused on chromatin state switches between conditions (Supplemental Table S4) and added  
380 directionality to the chromatin state switches (that we chose to be active or repressive switches).  
381 We grouped the states into 3 main categories: promoters, enhancers and enhancer priming. The  
382 states involved in each group, as well as the definition of the directional switches they are involved  
383 in are summarized in Fig. 2B. For each gene, we also summarized all chromatin states expressed  
384 as a percentage of coverage across the gene body and defined the state with the highest coverage  
385 as being the “major state” for a given gene. We grouped those major states into the 2 categories of  
386 active and repressed as indicated in Fig. 2B. To obtain the genes showing directional switches,  
387 genes activated should display one of the following features: i) major state transition from  
388 repressed to active ii) major active state with at least one additional chromatin state switch towards  
389 activation. On the contrary, genes repressed should display either i) transition from an active to a  
390 repressed major state ii) major repressive state with at least one additional chromatin state switch  
391 towards repression as defined in Fig. 2B.

392

### 393 **RNA-seq assay and data analysis**

394 RNA-seq studies were performed on the same donor muscle cell lines used for 4C-seq and ChIP-  
395 seq analyses of CN (CN-3, CN-4) and FSHD1 (FSHD1-3, FSHD1-4) human primary myoblasts  
396 and myotubes day 4. Briefly, total RNA was isolated using the miRNA Tissue kit on an automated  
397 Maxwell RSC extractor, following the manufacturer's instructions. RNA integrity was assessed on  
398 TapeStation. Subsequently, RNA for each donor muscle cell line was used to generate single-end  
399 75-bp sequencing libraries with the TruSeq Stranded mRNA Library Prep Kit, according to the  
400 manufacturer's protocol. Sequencing was performed on a NextSeq500.



401 In addition, published RNA-seq dataset GSE56787 (Yao et al. 2014) consisting of human primary  
402 healthy, as well as FSHD myoblasts/myotubes obtained from the University of Rochester bio-  
403 repository (<http://www.urmc.rochester.edu/fields-center>) were also analyzed.

404 All fastq files were analyzed with FastQC v0.11.2. Adapters were removed and trimming was  
405 performed with Trimmomatic with standard parameters. Reads mapping to the reference genome  
406 GRCh37/hg19 was performed with STAR 2.3.0e (Dobin et al. 2013). The reference annotation  
407 used was GENCODEv19 and normalized FPKM (fragments per kilobase of transcript per million  
408 mapped reads) values were obtained with Cuffdiff (Trapnell et al. 2013). Normalized FPKM were  
409  $\log_2$  transformed and a value of 1 was added to all FPKM values to finally obtain  $\log_2 ( 1+ \text{FPKM} )$   
410 values used in downstream analyses (Supplemental Table S4; Supplemental Table S5). For more  
411 details, see Supplemental Methods.

412

### 413 **Gene Ontology analysis**

414 Gene Ontology analysis was performed on protein-coding genes and retrieved from different  
415 analysis with the Cytoscape v3.2.0 (Shannon et al. 2003) plug-in ClueGO v2.1.5 (Bindea et al.  
416 2009). Statistically enriched Biological Processes (updated on 04/18/2016) were functionally  
417 grouped according to their k-score, and the most significant GO term of each group was used as  
418 summarizing GO term for the group. Full lists of GO terms and associated genes are available in  
419 Supplemental Table S5.

420

### 421 **Gene Set Enrichment Analysis (GSEA)**

422 GSEA was performed as described in (Subramanian et al. 2005). The gene set was represented  
423 by the 319 lost-activated genes or by the 131 lost-repressed genes (genes from Fig. 3A;  
424 Supplemental Table S5). We tested if those genes were significantly enriched in a gene  
425 expression dataset associated with a skeletal muscle atrophic condition (disuse muscle atrophy,  
426 GSE21496; Supplemental Table S5; (Reich et al. 2010)). We also tested the association of our  
427 gene sets with a gene expression dataset from skeletal muscle hypertrophy (GSE12474;  
428 Supplemental Table S5; (Goto et al. 2011)). GSEA was performed on those datasets with the

429 ranking metric Signal2noise with 1,000 phenotype permutations for statistical assessment of  
430 enrichment.

431

### 432 **Three-dimensional multicolor DNA FISH**

433 To produce probes for 3D multicolor DNA FISH we used the following BAC DNA clones (BACPAC  
434 Resources Program, CHORI): CH16-77M12 (D4Z4, containing at least 15 units of D4Z4 repeat, B  
435 Bodega, unpublished and (Cabianca et al. 2012)), RP11-279K24 (4q), RP11-846C19 (C-), RP11-  
436 115K4 (C+), RP11-288G11 (10q26.3) and RP11-174I12 (*FBXO32*). Probes used for 3D multicolor  
437 DNA FISH in transfection experiments presented in Fig. 5A-C were produced from PCR designed  
438 on the pTARBAC6 backbone of the transfected CH16-291A23 BAC (BAC 4q-D4Z4n), on the  
439 pBACe3.6 backbone of the transfected RP11-2A16 BAC (Ctrl BAC), on a 35 Kb genomic region of  
440 4q35.1 (4q) and on a 35 Kb genomic region of *FBXO32*. Primers used are reported in  
441 Supplemental Table S6. 1-3  $\mu$ g of BAC DNA or pooled PCR products were labelled with bio-dUTP,  
442 dig-dUTP or cy3-dUTP through nick translation. The 3D multicolor DNA FISH assay was  
443 performed accordingly to (Cremer et al. 2008) with minor adaptations. One to three donor muscle  
444 cell lines of CN and FSHD human primary myoblasts or myotubes day 4 were processed for each  
445 experiment. An Eclipse Ti-E (Nikon Instruments) microscope was used to scan the nuclei, with an  
446 axial distance between 0.2-0.25  $\mu$ m consecutive sections. In order to automatically analyze 3D  
447 multicolor DNA FISH in fluorescence cell image z-stacks, we developed a tool in MATLAB. The  
448 tool, that we named NuCL $\epsilon$ D (Nuclear Contacts Locator in 3D), is capable to automatically detect  
449 and localize fluorescent 3D spots in cell image stacks. Measurements retrieved are shown in  
450 Supplemental Table S3. Details on 3D multicolor DNA FISH protocol and NuCL $\epsilon$ D algorithm  
451 description are provided in Supplemental Methods.

452

### 453 **Chromatin conformation capture (3C)**

454 The 3C assay was performed as previously described (Cortesi and Bodega 2016) with minor  
455 adaptations. Two donor muscle cell lines of CN (CN-3, CN-4) and FSHD1 (FSHD1-3, FSHD1-4)  
456 human primary myoblasts ( $3.5 \times 10^6$  per sample) nuclei were processed. One to two biological

457 replicates for each cell line was done. Digestion was performed using Hind III. A reference  
458 template was generated by digesting, mixing and ligating a BAC covering the genomic region of  
459 interest (*FBXO32* region, RP11-174I12). 3C templates and the reference template were used to  
460 perform PCR analysis with DreamTaq DNA Polymerase using primers designed around the Hind  
461 III restriction sites present at *FBXO32* region and, as bait primer, the same of *FBXO32-4C*  
462 (Supplemental Table S6) on a Veriti 96-Well Thermal Cycler. The PCR products were  
463 densitometrically quantified using the ImageJ software. Data are presented as the ratio of  
464 amplification obtained with 3C templates in respect to the reference template. For more details,  
465 see Supplemental Methods.

466

#### 467 **BAC transfection**

468 BAC transfections were performed accordingly to (Montigny et al. 2003) with minor adaptations.  
469 CN and FSHD1 human primary and immortalized myoblasts were plated. The following day, BAC  
470 DNA (RP11-2A16, as control BAC, representative of an unrelated and not interacting genomic  
471 region, Chr 17q21.33, and CH16-291A23, containing at least 15 units of D4Z4 repeat, B Bodega,  
472 unpublished and (Cabianca et al. 2012)) were diluted in Opti-MEM with the addition of P3000  
473 Reagent. Lipofectamine 3000 Reagent were diluted in Opti-MEM. After 5 min BAC DNA (plus  
474 P3000) and Lipofectamine preparations were gently mixed and incubated for 20 min at room  
475 temperature. Transfection complexes were then added to the cells and incubated at 37 °C for 48 h.  
476 The primer pairs used for PCR or qRT-PCR amplifications are shown in Supplemental Table S6.  
477 For more details on transfection efficiency and DNA extraction, see Supplemental Methods.

478

#### 479 **Statistics and Bioinformatics**

480 To determine the significance between two groups, we used Wilcoxon matched-pairs signed rank  
481 test, Student's *t*-test or Fisher's exact test, as reported in Figure legends; exact *P* values and exact  
482 types of tests used are specified in Figure legends. For correlation analysis, we used Pearson  
483 correlation; the exact values are specified in the figures. Multiple comparisons were done by two-

484 way ANOVA followed by Bonferroni post-test correction; exact *P* values and types of tests used  
485 are specified in Figure legends.

486 For all statistical tests, the 0.05 level of confidence was accepted for statistical significance;  
487 statistical significance is denoted by asterisks in figures, where \* represent p-value <0.05, \*\*  
488 represents <0.01, \*\*\* represents <0.001 and \*\*\*\* represents <0.0001.

489 All reads were assessed for quality using FastQC and processed using Trimmomatic. They were  
490 aligned to the human genome (hg19) using either Bowtie 2 (Langmead and Salzberg 2012) or  
491 STAR 2.3.0e (Dobin et al. 2013). Aligning to GRCh38 is expected to provide similar results, as only  
492 a small number of bases change genome-wide with the major difference between the releases is in  
493 centromere assembly (Guo et al. 2017), which is not the focus of our study.

494

#### 495 **Data access**

496 Circular chromosome conformation capture and sequencing data (4C-seq), chromatin  
497 immunoprecipitation and RNA sequencing data (ChIP-seq and RNA-seq) for the human samples  
498 have been submitted to the NCBI Sequence Read Archive (SRA, <http://www.ncbi.nlm.nih.gov/sra/>)  
499 under the accession number SRP117155.

500

#### 501 **Acknowledgments**

502 We thank C. Lanzuolo, D. Gabellini, V. Ranzani, M. R. Matarazzo and E. Battaglioli for their  
503 stimulating discussions and constructive criticisms of this manuscript. We gratefully acknowledge  
504 M. Mora from the Telethon BioBank of the C. Besta Neurological Institute, R. Tawil from the Fields  
505 Center for FSHD of the Rochester Medical Center Dept. of Neurology and J. Chen from the  
506 University of Massachusetts Medical School Wellstone center for FSH Muscular Dystrophy  
507 Research, Wellstone Program & Dept. of Cell & Developmental Biology for providing the human  
508 myoblasts. The authors acknowledge the scientific and technical assistance of the INGM Imaging  
509 Facility (Istituto Nazionale di Genetica Molecolare "Romeo ed Enrica Invernizzi" (INGM), Milan,  
510 Italy), in particular C. Cordiglieri, for assistance during 3D multicolor DNA FISH images acquisition.

511 pCMV-Mock and pCMV-DUX4 plasmids was a kind gift of D. Gabellini. This work has been  
512 supported by the following grants to B.B.: EPIGEN Italian flagship program, Association Française  
513 contre les Myopathies (AFM-Telethon, grant nr 18754) and Giovani Ricercatori, Italian Ministry of  
514 Health (GR-2011-02349383).

515

516 **Author contributions**

517 A.C. and M.P. and S.S, designed and performed experiments, analyzed the data and wrote the  
518 manuscript. F.M and E.S. performed experiments. F.G., L.A., G.O. developed the new algorithm  
519 for 3D multicolor DNA FISH image analysis. C.C. and G.S. performed RNA-seq library preparation,  
520 NGS data processing and sequencing. B.B. conceived this study, designed experiments, analyzed  
521 the data and wrote the manuscript.

522

523 **Disclosure declaration**

524 The authors declare no competing financial interests.

525

526 **Figure Legends**

527 **Figure 1. 4q-D4Z4 specific 4C-seq highlights FSHD1 impaired interactome**

528 (A) (left) Circos plot depicting *cis* and *trans* 4q-D4Z4 interactions in CN (CN-3, CN-4) myoblasts  
529 called by 4C-ker. Common interactions with FSHD1 (FSHD1-3, FSHD1-4) myoblasts are in grey,  
530 whereas interactions specifically lost in FSHD1 are highlighted in light blue. (right) Zoomed-in  
531 circos plot representation of common (grey) and FSHD1 lost (light blue) *cis* interactions on Chr 4.  
532 Gene are indicated for a region extending up to 4 Mb from the VP. Black triangles in circos plots  
533 depict the VP localization. (B) Representative nuclei of 3D multicolor DNA FISH using probes  
534 mapping to 4q35.1 region (4q, green), a 4q-D4Z4 positive interacting region (8q24.3, C+, red) and  
535 a 4q-D4Z4 not interacting region (3q11.2, C-, magenta) and in CN (CN-1, CN-2, CN-3, CN-4) and  
536 FSHD1 (FSHD1-1, FSHD1-2, FSHD1-3, FSHD1-4) myoblasts. Nuclei are counterstained with  
537 DAPI (blue). All images at 63X magnification. Scale bar=5  $\mu$ m. (C) Cumulative frequency  
538 distributions of distances (below 1.5  $\mu$ m) between 4q and C+ and between 4q and C- in CN (dark  
539 and light grey; left) and FSHD1 (dark and light blue; right) myoblasts. n=1,296 (CN 4q/C+), 1,708  
540 (CN 4q/C-), 884 (FSHD1 4q/C+) and 1,128 (FSHD1 4q/C-). *P* values were calculated by unpaired  
541 one-tailed *t*-test with confidence interval of 99%. Asterisks represent statistical *P* values; for 4q/C+  
542 vs 4q/C- in CN and FSHD1  $p < 0.0001$ . (D) Percentage of nuclei positive for the interactions (under  
543 the cut-off of 1.5  $\mu$ m). n= 427 (CN 4q/C-), 324 (CN 4q/C+), 282 (FSHD1 4q/C-) and 221 (FSHD1  
544 4q/C+). *P* values were calculated by fisher's exact one-sided test with confidence interval of 99%.  
545 Asterisks represent statistical *P* values; for 4q/C- vs. 4q/C+ in CN  $p < 0.0001$ ; for 4q/C- vs. 4q/C+ in  
546 FSHD1  $p = 0.0046$ .

547

548 **Figure 2. Chromatin segmentation analysis revealed chromatin state switches consistent**  
549 **with transcriptional changes in FSHD1 muscle cells**

550 (A) ChromHMM 15-state model obtained with ChIP-seq datasets for H3K36me3, H3K4me1,  
551 H3K27ac, H3K4me3 and H3K27me3. Heatmaps display histone marks emission probabilities and  
552 transition probabilities between chromatin states. (B) Schematic representation of the strategy  
553 used to assign genes as activated or repressed in FSHD1. (C) Expression levels from RNA-seq

554 datasets for FSHD1 activated and repressed genes in MB (left) and MT (right), in CN (CN-3, CN-4  
555 and Yao's datasets C20, C21, C22) and FSHD1 (FSHD1-3, FSHD1-4 and Yao's datasets F4, F6)  
556 (Yao et al. 2014). Box & whiskers plots show the median of matched expression values of each  
557 gene for CN and FSHD1 and whiskers extend to the 5-95 percentiles. *P* values were calculated by  
558 paired two-tailed Wilcoxon matched-pairs signed rank test with confidence interval of 99%.  
559 Asterisks represent statistical *P* values; for CN vs. FSHD1 activated in MB  $p < 0.0001$ ; for CN vs.  
560 FSHD1 repressed in MB  $p < 0.0001$ ; for CN vs. FSHD1 repressed in MT  $p < 0.0001$ .

561

562 **Figure 3. Genes which have lost the interaction with 4q-D4Z4 have a more active chromatin**  
563 **state and are enriched for muscle atrophy signature in FSHD muscle cells**

564 (A) Flowchart of filtering steps to identify FSHD1 altered genes. Genes within lost 4q-D4Z4  
565 interactions were filtered as activated (red) or repressed (blue) in FSHD1. (B) Gene Ontology  
566 analysis (Biological Processes) of FSHD1 lost-activated and repressed genes. Bars correspond to  
567  $-\log_{10}$  of the *P* value. (C) Gene Set Enrichment Analysis (GSEA) results of the 319 FSHD1 lost-  
568 activated genes performed on expression data from unloading-induced muscle atrophy subjects  
569 (Reich et al. 2010). Genes upregulated in atrophic condition are depicted in red whereas genes not  
570 enriched are depicted in blue. NES, Normalized Enrichment Score. (D) Expression levels from  
571 RNA-seq datasets for atrophic genes (Reich et al. 2010), in CN (CN-3, CN-4 and Yao's datasets  
572 C20, C21, C22) and FSHD1 (FSHD1-3, FSHD1-4 and Yao's datasets F4, F6) (Yao et al. 2014) MB  
573 and MT. Box & whiskers plots show the median of matched expression values of each gene for CN  
574 and FSHD1 and whiskers extend to the 5-95 percentiles. *P* values were calculated by paired two-  
575 tailed *t*-test with confidence interval of 99%. Asterisks represent statistical *P* values; for CN vs.  
576 FSHD1 in MB  $p = 0.0099$ . (E) Expression levels from RNA-seq datasets for atrophic genes (Reich et  
577 al. 2010), in CN (CN-3, CN-4 and Yao's datasets C20, C21, C22) and FSHD2 (Yao's datasets F12,  
578 F14, F20) (Yao et al. 2014) MB and MT. Box & whiskers plots show the median of matched  
579 expression values of each gene for CN and FSHD2 and whiskers extend to the 5-95 percentiles. *P*  
580 values were calculated by paired two-tailed *t*-test with confidence interval of 99%. Asterisks

581 represent statistical  $P$  values; for CN vs. FSHD2 in MB  $p=0.0251$ ; for CN vs. FSHD2 in MT  
582  $p=0.0041$ .

583

584 **Figure 4. *FBXO32* gene has a deregulated chromatin structure and it is overexpressed in**  
585 **FSHD1 and FSHD2 muscle cells**

586 (A) Representative nuclei of 3D multicolor DNA FISH using probes mapping to 4q35.1 region (4q,  
587 green) and *FBXO32* (red) in CN (CN-1, CN-3, CN-4), FSHD1 (FSHD1-1, FSHD1-3, FSHD1-4) and  
588 FSHD2 (FSHD2-1, FSHD2-2) myoblasts. Nuclei are counterstained with DAPI (blue). All images at  
589 63X magnification. Scale bar=5  $\mu\text{m}$ . (B) Cumulative frequency distribution of distances (below 1.5  
590  $\mu\text{m}$ ) between 4q and *FBXO32* in CN (grey), FSHD1 (blue) and FSHD2 (dark blue) myoblasts.  $n=$   
591 3,652 (CN), 2,464 (FSHD1) and 1,020 (FSHD2).  $P$  values were calculated by unpaired one-tailed  
592  $t$ -test with confidence interval of 99%. Asterisks represent statistical  $P$  values; for CN vs. FSHD1  
593  $p=0.0473$ ; for CN vs. FSHD2  $p=0.0036$ . (C) Percentage of nuclei positive for the interactions  
594 (under the cut-off of 1.5  $\mu\text{m}$ ).  $n=$  913 (CN), 616 (FSHD1) and 255 (FSHD2). (D) 4C normalized  
595 coverage tracks at the *FBXO32* locus for *FBXO32*-4C VP in CN (CN-3, CN-4; grey) and FSHD1  
596 (FSHD1-3, FSHD1-4; blue). (E) (top) Schematic representation of the *FBXO32* locus and Hind III  
597 sites. (middle) Chart showing the frequencies of 3C interaction between *FBXO32* promoter and the  
598 indicated Hind III restriction sites (sites 4-32), using the same bait of the 4C VP (light gray vertical  
599 bar) in CN (grey) and FSHD (blue).  $n=3$  (CN) and 3 (FSHD1). S.e.m. is indicated.  $P$  values were  
600 calculated by two-way ANOVA followed by Bonferroni post-test correction. Asterisks represent  
601 statistical  $P$  values; for P19, P25 and P30 CN vs. FSHD1  $p<0.001$ ; for P32 CN vs. FSHD1  $p<0.01$ .  
602 (bottom) 4C normalized coverage tracks as well as ChromHMM chromatin states tracks at the  
603 *FBXO32* locus for *FBXO32*-4C VP in CN (grey) and FSHD1 (blue). The arrow represents the  
604 promoter region; enhancers are highlighted in yellow. (F) Bar plot showing enrichment of RNA Pol  
605 II at *FBXO32* promoter (left) and an intragenic region (right) assessed by ChIP-qPCR experiment  
606 in CN (grey) and FSHD1 (blue) myoblasts. Results are presented as % of input.  $n=2$  CN (CN-3,  
607 CN-4) and 2 FSHD1 (FSHD3, FSHD1-4). S.e.m. is indicated.  $P$  values were calculated by  
608 unpaired one-tailed  $t$ -test with confidence interval of 99%. Dots represent the values of each



609 replicate; asterisks represent statistical  $P$  values; for *FBXO32* intragenic region CN vs. FSHD1  
610  $p=0.0050$ . (G) Expression levels of *FBXO32* gene during CN (grey), FSHD1 (blue) and FSHD2  
611 (dark blue) differentiation (MB, myoblasts, MT2, myotubes day 2, MT4, myotubes day 4, MT6,  
612 myotubes day 6). Data were normalized on *GAPDH* expression and on MB.  $n=4$  CN (CN-1, CN-2,  
613 CN-3, CN-4), 4 FSHD1 (FSHD1-1, FSHD1-2, FSHD1-3, FSHD1-4) and 2 FSHD2 (FSHD2-1,  
614 FSHD2-2). S.e.m. is indicated.  $P$  values were calculated by two-way ANOVA followed by  
615 Bonferroni post-test correction. Dots represent the values of each replicate; asterisks represent  
616 statistical  $P$  values; for MT4, CN vs. FSHD1  $p<0.0290$  and CN vs. FSHD2  $p<0.0001$ .

617

### 618 **Figure 5. Ectopic 4q-D4Z4 array restores the expression of FSHD1 lost interacting genes**

619 (A) (top) Representation of the BAC containing 4q upstream region and D4Z4 array (at least 15  
620 D4Z4 units, B Bodega, unpublished (BAC 4q-D4Z4n)). (bottom) Representative nucleus of 3D  
621 multicolor DNA FISH using probes for the transfected BAC backbone (red) and 4q35.1 region (4q,  
622 green) in myoblasts transfected with BAC 4q-D4Z4n. Nuclei are counterstained with DAPI (blue).  
623 All images at 63X magnification. Scale bar=5  $\mu$ m.  $n$ , number of nuclei analyzed. (B)  
624 Representative nucleus of 3D multicolor DNA FISH using probes for the transfected BAC  
625 backbone (red) and 4q35.1 region (4q, green) in myoblasts transfected with Ctrl BAC (RP11-2A16,  
626 representative of an unrelated and not interacting genomic region, Chr 17q21.33). Nuclei are  
627 counterstained with DAPI (blue). All images at 63X magnification. Scale bar=5  $\mu$ m.  $n$ , number of  
628 nuclei analyzed. (C) Representative nucleus of 3D multicolor DNA FISH using probes for the  
629 transfected BAC backbone (red) and *FBXO32* region (*FBXO32*, light blue) in myoblasts  
630 transfected with BAC 4q-D4Z4n. Nuclei are counterstained with DAPI (blue). All images at 63X  
631 magnification. Scale bar=5  $\mu$ m.  $n$ , number of nuclei analyzed. (D) Bar plots showing expression  
632 levels of *FBXO32*, *TRIB3* and *ZNF555* (FSHD1 lost-activated genes) in CN (grey) and FSHD1  
633 (blue) myoblasts transfected with Ctrl BAC and BAC 4q-D4Z4n. Data were normalized on *GAPDH*  
634 expression.  $n$ =at least 3 (with the exception of *TRIB3* and *ZNF555* CN Ctrl BAC,  $n=2$ ). S.e.m. is  
635 indicated.  $P$  values were calculated by paired one-tailed  $t$ -test with confidence interval of 99%.  
636 Dots represent the values of each replicate; asterisks represent statistical  $P$  values; for *FBXO32*

637 Ctrl BAC vs. BAC 4q-D4Z4n in CN  $p=0.0182$ ; for *FBXO32* Ctrl BAC vs BAC 4q-D4Z4n in FSHD1  
638  $p=0.0073$ ; for *TRIB3* Ctrl BAC vs BAC 4q-D4Z4n in FSHD1  $p=0.0281$ . (E) Bar plot showing  
639 expression levels of *LZTS3* (FSHD1 lost-repressed gene) in CN (grey) and FSHD1 (blue)  
640 myoblasts transfected with Ctrl BAC and BAC 4q-D4Z4n. Data were normalized on *GAPDH*  
641 expression.  $n=3$  (with the exception of CN Ctrl BAC,  $n=2$ ). S.e.m. is indicated.  $P$  value was  
642 calculated by paired one-tailed  $t$ -test with confidence interval of 99%. Dots represent the values of  
643 each replicate; asterisks represent statistical  $P$  values; for Ctrl BAC vs. BAC 4q-D4Z4n in FSHD1  
644  $p=0.0296$ . (F) Bar plots showing expression levels of *FOXO3* and *MYOG* (not interacting genes) in  
645 CN (grey) and FSHD1 (blue) myoblasts transfected with Ctrl BAC and BAC 4q-D4Z4n. Data were  
646 normalized on *GAPDH* expression.  $n=$ at least 3. S.e.m. is indicated. Dots represent the values of  
647 each replicate.

648

649 **Figure 6. Model of 4q-D4Z4 mediated regulation of atrophic genes transcription**

650 (A) 4q-D4Z4 array is interacting with a subset of atrophic genes, organizing their chromatin  
651 structure and keeping on hold their transcription in healthy donor muscle cells. (B) In FSHD1  
652 patients' muscle cells, the deleted and hypomethylated 4q-D4Z4 array causes an impairment of  
653 D4Z4 interactome leading to a chromatin switch towards an active state (mainly enhancer and  
654 promoter regions), which in turn results in the transcriptional upregulation of the atrophic genes.

655

656 **References**

- 657 Achinger-Kawecka J, Clark SJ. 2017. Disruption of the 3D cancer genome blueprint. *Epigenomics*  
658 **9**: 47-55.
- 659 Bakker E, Wijmenga C, Vossen RH, Padberg GW, Hewitt J, van der Wielen M, Rasmussen K,  
660 Frants RR. 1995. The FSHD-linked locus D4F104S1 (p13E-11) on 4q35 has a homologue  
661 on 10qter. *Muscle Nerve Suppl*: S39-44.
- 662 Bindea G, Mlecnik B, Hackl H, Charoentong P, Tosolini M, Kirilovsky A, Fridman WH, Pages F,  
663 Trajanoski Z, Galon J. 2009. ClueGO: a Cytoscape plug-in to decipher functionally grouped  
664 gene ontology and pathway annotation networks. *Bioinformatics* **25**: 1091-1093.
- 665 Block GJ, Narayanan D, Amell AM, Petek LM, Davidson KC, Bird TD, Tawil R, Moon RT, Miller  
666 DG. 2013. Wnt/beta-catenin signaling suppresses DUX4 expression and prevents  
667 apoptosis of FSHD muscle cells. *Hum Mol Genet* **22**: 4661-4672.
- 668 Bodega B, Cardone MF, Muller S, Neusser M, Orzan F, Rossi E, Battaglioli E, Marozzi A, Riva P,  
669 Rocchi M et al. 2007. Evolutionary genomic remodelling of the human 4q subtelomere  
670 (4q35.2). *BMC Evol Biol* **7**: 39.
- 671 Bodega B, Cardone MF, Rocchi M, Meneveri R, Marozzi A, Ginelli E. 2006. The boundary of  
672 macaque rDNA is constituted by low-copy sequences conserved during evolution.  
673 *Genomics* **88**: 564-571.
- 674 Bodega B, Marasca F, Ranzani V, Cherubini A, Della Valle F, Neguembor MV, Wassef M, Zippo A,  
675 Lanzuolo C, Pagani M et al. 2017. A cytosolic Ezh1 isoform modulates a PRC2-Ezh1  
676 epigenetic adaptive response in postmitotic cells. *Nat Struct Mol Biol*  
677 doi:10.1038/nsmb.3392.
- 678 Bodega B, Orlando V. 2014. Repetitive elements dynamics in cell identity programming,  
679 maintenance and disease. *Curr Opin Cell Biol* **31**: 67-73.
- 680 Bodega B, Ramirez GD, Grasser F, Cheli S, Brunelli S, Mora M, Meneveri R, Marozzi A, Mueller S,  
681 Battaglioli E et al. 2009. Remodeling of the chromatin structure of the facioscapulohumeral  
682 muscular dystrophy (FSHD) locus and upregulation of FSHD-related gene 1 (FRG1)  
683 expression during human myogenic differentiation. *BMC Biol* **7**: 41.
- 684 Bodine SC, Baehr LM. 2014. Skeletal muscle atrophy and the E3 ubiquitin ligases MuRF1 and  
685 MAFbx/atrogen-1. *Am J Physiol Endocrinol Metab* **307**: E469-484.
- 686 Bolger AM, Lohse M, Usadel B. 2014. Trimmomatic: a flexible trimmer for Illumina sequence data.  
687 *Bioinformatics* **30**: 2114-2120.
- 688 Bosnakovski D, Xu Z, Gang EJ, Galindo CL, Liu M, Simsek T, Garner HR, Agha-Mohammadi S,  
689 Tassin A, Coppee F et al. 2008. An isogenetic myoblast expression screen identifies  
690 DUX4-mediated FSHD-associated molecular pathologies. *EMBO J* **27**: 2766-2779.
- 691 Broucqsaault N, Morere J, Gaillard MC, Dumonceaux J, Torrents J, Salort-Campana E, Maues De  
692 Paula A, Bartoli M, Fernandez C, Chesnais AL et al. 2013. Dysregulation of 4q35- and  
693 muscle-specific genes in fetuses with a short D4Z4 array linked to facio-scapulo-humeral  
694 dystrophy. *Hum Mol Genet* **22**: 4206-4214.

- 695 Cabianca DS, Casa V, Bodega B, Xynos A, Ginelli E, Tanaka Y, Gabellini D. 2012. A long ncRNA  
696 links copy number variation to a polycomb/trithorax epigenetic switch in FSHD muscular  
697 dystrophy. *Cell* **149**: 819-831.
- 698 Cabianca DS, Gabellini D. 2010. The cell biology of disease: FSHD: copy number variations on the  
699 theme of muscular dystrophy. *J Cell Biol* **191**: 1049-1060.
- 700 Cheutin T, Cavalli G. 2018. Loss of PRC1 induces higher-order opening of Hox loci independently  
701 of transcription during Drosophila embryogenesis. *Nat Commun* **9**: 3898.
- 702 Corces MR, Corces VG. 2016. The three-dimensional cancer genome. *Curr Opin Genet Dev* **36**: 1-  
703 7.
- 704 Cortesi A, Bodega B. 2016. Chromosome Conformation Capture in Primary Human Cells. *Methods*  
705 *Mol Biol* **1480**: 213-221.
- 706 Cremer M, Grasser F, Lanctot C, Muller S, Neusser M, Zinner R, Solovei I, Cremer T. 2008.  
707 Multicolor 3D fluorescence in situ hybridization for imaging interphase chromosomes.  
708 *Methods Mol Biol* **463**: 205-239.
- 709 Darrow EM, Huntley MH, Dudchenko O, Stamenova EK, Durand NC, Sun Z, Huang SC, Sanborn  
710 AL, Machol I, Shamim M et al. 2016. Deletion of DXZ4 on the human inactive X  
711 chromosome alters higher-order genome architecture. *Proc Natl Acad Sci U S A* **113**:  
712 E4504-4512.
- 713 Daxinger L, Tapscott SJ, van der Maarel SM. 2015. Genetic and epigenetic contributors to FSHD.  
714 *Curr Opin Genet Dev* **33**: 56-61.
- 715 de Greef JC, Lemmers RJ, van Engelen BG, Sacconi S, Venance SL, Frants RR, Tawil R, van der  
716 Maarel SM. 2009. Common epigenetic changes of D4Z4 in contraction-dependent and  
717 contraction-independent FSHD. *Hum Mutat* **30**: 1449-1459.
- 718 de Laat W, Duboule D. 2013. Topology of mammalian developmental enhancers and their  
719 regulatory landscapes. *Nature* **502**: 499-506.
- 720 Deidda G, Cacurri S, Grisanti P, Vigneti E, Piazzo N, Felicetti L. 1995. Physical mapping evidence  
721 for a duplicated region on chromosome 10qter showing high homology with the  
722 facioscapulohumeral muscular dystrophy locus on chromosome 4qter. *Eur J Hum Genet* **3**:  
723 155-167.
- 724 Deng X, Ma W, Ramani V, Hill A, Yang F, Ay F, Berletch JB, Blau CA, Shendure J, Duan Z et al.  
725 2015. Bipartite structure of the inactive mouse X chromosome. *Genome Biol* **16**: 152.
- 726 Dixit M, Anseau E, Tassin A, Winokur S, Shi R, Qian H, Sauvage S, Matteotti C, van Acker AM,  
727 Leo O et al. 2007. DUX4, a candidate gene of facioscapulohumeral muscular dystrophy,  
728 encodes a transcriptional activator of PITX1. *Proc Natl Acad Sci U S A* **104**: 18157-18162.
- 729 Dobin A, Davis CA, Schlesinger F, Drenkow J, Zaleski C, Jha S, Batut P, Chaisson M, Gingeras  
730 TR. 2013. STAR: ultrafast universal RNA-seq aligner. *Bioinformatics* **29**: 15-21.
- 731 Ernst J, Kellis M. 2012. ChromHMM: automating chromatin-state discovery and characterization.  
732 *Nat Methods* **9**: 215-216.
- 733 Finn EH, Pegoraro G, Brandao HB, Valton AL, Oomen ME, Dekker J, Mirny L, Misteli T. 2019.  
734 Extensive Heterogeneity and Intrinsic Variation in Spatial Genome Organization. *Cell* **176**:  
735 1502-1515 e1510.

- 736 Gabellini D, Green MR, Tupler R. 2002. Inappropriate gene activation in FSHD: a repressor  
737 complex binds a chromosomal repeat deleted in dystrophic muscle. *Cell* **110**: 339-348.
- 738 Gabriels J, Beckers MC, Ding H, De Vriese A, Plaisance S, van der Maarel SM, Padberg GW,  
739 Frants RR, Hewitt JE, Collen D et al. 1999. Nucleotide sequence of the partially deleted  
740 D4Z4 locus in a patient with FSHD identifies a putative gene within each 3.3 kb element.  
741 *Gene* **236**: 25-32.
- 742 Geng LN, Yao Z, Snider L, Fong AP, Cech JN, Young JM, van der Maarel SM, Ruzzo WL,  
743 Gentleman RC, Tawil R et al. 2012. DUX4 activates germline genes, retroelements, and  
744 immune mediators: implications for facioscapulohumeral dystrophy. *Dev Cell* **22**: 38-51.
- 745 Giacalone J, Friedes J, Francke U. 1992. A novel GC-rich human macrosatellite VNTR in Xq24 is  
746 differentially methylated on active and inactive X chromosomes. *Nat Genet* **1**: 137-143.
- 747 Giorgetti L, Lajoie BR, Carter AC, Attia M, Zhan Y, Xu J, Chen CJ, Kaplan N, Chang HY, Heard E  
748 et al. 2016. Structural organization of the inactive X chromosome in the mouse. *Nature* **535**:  
749 575-579.
- 750 Gomes MD, Lecker SH, Jagoe RT, Navon A, Goldberg AL. 2001. Atrogin-1, a muscle-specific F-  
751 box protein highly expressed during muscle atrophy. *Proc Natl Acad Sci U S A* **98**: 14440-  
752 14445.
- 753 Goto K, Oda H, Kondo H, Igaki M, Suzuki A, Tsuchiya S, Murase T, Hase T, Fujiya H, Matsumoto I  
754 et al. 2011. Responses of muscle mass, strength and gene transcripts to long-term heat  
755 stress in healthy human subjects. *Eur J Appl Physiol* **111**: 17-27.
- 756 Gregory TR. 2005. Synergy between sequence and size in large-scale genomics. *Nat Rev Genet*  
757 **6**: 699-708.
- 758 Guo Y, Dai Y, Yu H, Zhao S, Samuels DC, Shyr Y. 2017. Improvements and impacts of GRCh38  
759 human reference on high throughput sequencing data analysis. *Genomics* **109**: 83-90.
- 760 Hendrickson PG, Dorais JA, Grow EJ, Whiddon JL, Lim JW, Wike CL, Weaver BD, Pflueger C,  
761 Emery BR, Wilcox AL et al. 2017. Conserved roles of mouse DUX and human DUX4 in  
762 activating cleavage-stage genes and MERVL/HERVL retrotransposons. *Nat Genet* **49**: 925-  
763 934.
- 764 Hewitt JE, Lyle R, Clark LN, Valleley EM, Wright TJ, Wijmenga C, van Deutekom JC, Francis F,  
765 Sharpe PT, Hofker M et al. 1994. Analysis of the tandem repeat locus D4Z4 associated  
766 with facioscapulohumeral muscular dystrophy. *Hum Mol Genet* **3**: 1287-1295.
- 767 Himeda CL, Debarnot C, Homma S, Beermann ML, Miller JB, Jones PL, Jones TI. 2014. Myogenic  
768 enhancers regulate expression of the facioscapulohumeral muscular dystrophy-associated  
769 DUX4 gene. *Mol Cell Biol* **34**: 1942-1955.
- 770 Hug CB, Grimaldi AG, Kruse K, Vaquerizas JM. 2017. Chromatin Architecture Emerges during  
771 Zygotic Genome Activation Independent of Transcription. *Cell* **169**: 216-228 e219.
- 772 Jansz N, Keniry A, Trussart M, Bildsoe H, Beck T, Tonks ID, Mould AW, Hickey P, Breslin K,  
773 Iminifoff M et al. 2018. Smchd1 regulates long-range chromatin interactions on the inactive  
774 X chromosome and at Hox clusters. *Nat Struct Mol Biol* **25**: 766-777.
- 775 Jiang G, Yang F, van Overveld PG, Vedanarayanan V, van der Maarel S, Ehrlich M. 2003. Testing  
776 the position-effect variegation hypothesis for facioscapulohumeral muscular dystrophy by

- 777 analysis of histone modification and gene expression in subtelomeric 4q. *Hum Mol Genet*  
778 **12**: 2909-2921.
- 779 Jiang T, Raviram R, Snetkova V, Rocha PP, Proudhon C, Badri S, Bonneau R, Skok JA, Kluger Y.  
780 2016. Identification of multi-loci hubs from 4C-seq demonstrates the functional importance  
781 of simultaneous interactions. *Nucleic Acids Res* **44**: 8714-8725.
- 782 Krijger PH, de Laat W. 2016. Regulation of disease-associated gene expression in the 3D  
783 genome. *Nat Rev Mol Cell Biol* **17**: 771-782.
- 784 Krijger PHL, de Laat W. 2017. Can We Just Say: Transcription Second? *Cell* **169**: 184-185.
- 785 Langmead B, Salzberg SL. 2012. Fast gapped-read alignment with Bowtie 2. *Nat Methods* **9**: 357-  
786 359.
- 787 Lanzuolo C. 2012. Epigenetic alterations in muscular disorders. *Comp Funct Genomics* **2012**:  
788 256892.
- 789 Lecker SH, Jagoe RT, Gilbert A, Gomes M, Baracos V, Bailey J, Price SR, Mitch WE, Goldberg  
790 AL. 2004. Multiple types of skeletal muscle atrophy involve a common program of changes  
791 in gene expression. *FASEB J* **18**: 39-51.
- 792 Lemmers RJ, de Kievit P, Sandkuijl L, Padberg GW, van Ommen GJ, Frants RR, van der Maarel  
793 SM. 2002. Facioscapulohumeral muscular dystrophy is uniquely associated with one of the  
794 two variants of the 4q subtelomere. *Nat Genet* **32**: 235-236.
- 795 Lemmers RJ, Tawil R, Petek LM, Balog J, Block GJ, Santen GW, Amell AM, van der Vliet PJ,  
796 Almomani R, Straasheijm KR et al. 2012. Digenic inheritance of an SMCHD1 mutation and  
797 an FSHD-permissive D4Z4 allele causes facioscapulohumeral muscular dystrophy type 2.  
798 *Nat Genet* **44**: 1370-1374.
- 799 Lemmers RJ, van der Vliet PJ, Klooster R, Sacconi S, Camano P, Dauwerse JG, Snider L,  
800 Straasheijm KR, van Ommen GJ, Padberg GW et al. 2010. A unifying genetic model for  
801 facioscapulohumeral muscular dystrophy. *Science* **329**: 1650-1653.
- 802 Lemmers RJ, Wohlgemuth M, van der Gaag KJ, van der Vliet PJ, van Teijlingen CM, de Knijff P,  
803 Padberg GW, Frants RR, van der Maarel SM. 2007. Specific sequence variations within the  
804 4q35 region are associated with facioscapulohumeral muscular dystrophy. *Am J Hum*  
805 *Genet* **81**: 884-894.
- 806 Lupianez DG, Kraft K, Heinrich V, Krawitz P, Brancati F, Klopocki E, Horn D, Kayserili H, Opitz JM,  
807 Laxova R et al. 2015. Disruptions of topological chromatin domains cause pathogenic  
808 rewiring of gene-enhancer interactions. *Cell* **161**: 1012-1025.
- 809 Lupianez DG, Spielmann M, Mundlos S. 2016. Breaking TADs: How Alterations of Chromatin  
810 Domains Result in Disease. *Trends Genet* **32**: 225-237.
- 811 Lyle R, Wright TJ, Clark LN, Hewitt JE. 1995. The FSHD-associated repeat, D4Z4, is a member of  
812 a dispersed family of homeobox-containing repeats, subsets of which are clustered on the  
813 short arms of the acrocentric chromosomes. *Genomics* **28**: 389-397.
- 814 Montigny WJ, Phelps SF, Illenye S, Heintz NH. 2003. Parameters influencing high-efficiency  
815 transfection of bacterial artificial chromosomes into cultured mammalian cells.  
816 *Biotechniques* **35**: 796-807.

- 817 Neguembor MV, Gabellini D. 2010. In junk we trust: repetitive DNA, epigenetics and  
818 facioscapulohumeral muscular dystrophy. *Epigenomics* **2**: 271-287.
- 819 Petrov A, Pirozhkova I, Carnac G, Laoudj D, Lipinski M, Vassetzky YS. 2006. Chromatin loop  
820 domain organization within the 4q35 locus in facioscapulohumeral dystrophy patients  
821 versus normal human myoblasts. *Proc Natl Acad Sci U S A* **103**: 6982-6987.
- 822 Politz JC, Scalzo D, Groudine M. 2013. Something silent this way forms: the functional  
823 organization of the repressive nuclear compartment. *Annu Rev Cell Dev Biol* **29**: 241-270.
- 824 Quinlan AR, Hall IM. 2010. BEDTools: a flexible suite of utilities for comparing genomic features.  
825 *Bioinformatics* **26**: 841-842.
- 826 Rao SS, Huntley MH, Durand NC, Stamenova EK, Bochkov ID, Robinson JT, Sanborn AL, Machol  
827 I, Omer AD, Lander ES et al. 2014. A 3D map of the human genome at kilobase resolution  
828 reveals principles of chromatin looping. *Cell* **159**: 1665-1680.
- 829 Raviram R, Rocha PP, Muller CL, Miraldi ER, Badri S, Fu Y, Swanzey E, Proudhon C, Snetkova V,  
830 Bonneau R et al. 2016. 4C-ker: A Method to Reproducibly Identify Genome-Wide  
831 Interactions Captured by 4C-Seq Experiments. *PLoS Comput Biol* **12**: e1004780.
- 832 Reich KA, Chen YW, Thompson PD, Hoffman EP, Clarkson PM. 2010. Forty-eight hours of  
833 unloading and 24 h of reloading lead to changes in global gene expression patterns related  
834 to ubiquitination and oxidative stress in humans. *J Appl Physiol (1985)* **109**: 1404-1415.
- 835 Rickard AM, Petek LM, Miller DG. 2015. Endogenous DUX4 expression in FSHD myotubes is  
836 sufficient to cause cell death and disrupts RNA splicing and cell migration pathways. *Hum*  
837 *Mol Genet* **24**: 5901-5914.
- 838 Rivera-Reyes A, Hayer KE, Bassing CH. 2016. Genomic Alterations of Non-Coding Regions  
839 Underlie Human Cancer: Lessons from T-ALL. *Trends Mol Med* **22**: 1035-1046.
- 840 Roadmap Epigenomics Consortium, Kundaje A, Meuleman W, Ernst J, Bilenky M, Yen A, Heravi-  
841 Moussavi A, Kheradpour P, Zhang Z, Wang J et al. 2015. Integrative analysis of 111  
842 reference human epigenomes. *Nature* **518**: 317-330.
- 843 Robin JD, Ludlow AT, Batten K, Gaillard MC, Stadler G, Magdinier F, Wright WE, Shay JW. 2015.  
844 SORBS2 transcription is activated by telomere position effect-over long distance upon  
845 telomere shortening in muscle cells from patients with facioscapulohumeral dystrophy.  
846 *Genome Res* **25**: 1781-1790.
- 847 Sacconi S, Salviati L, Desnuelle C. 2015. Facioscapulohumeral muscular dystrophy. *Biochim*  
848 *Biophys Acta* **1852**: 607-614.
- 849 Sandri M, Sandri C, Gilbert A, Skurk C, Calabria E, Picard A, Walsh K, Schiaffino S, Lecker SH,  
850 Goldberg AL. 2004. Foxo transcription factors induce the atrophy-related ubiquitin ligase  
851 atrogin-1 and cause skeletal muscle atrophy. *Cell* **117**: 399-412.
- 852 Shannon P, Markiel A, Ozier O, Baliga NS, Wang JT, Ramage D, Amin N, Schwikowski B, Ideker  
853 T. 2003. Cytoscape: a software environment for integrated models of biomolecular  
854 interaction networks. *Genome Res* **13**: 2498-2504.
- 855 Snider L, Geng LN, Lemmers RJ, Kyba M, Ware CB, Nelson AM, Tawil R, Filippova GN, van der  
856 Maarel SM, Tapscott SJ et al. 2010. Facioscapulohumeral dystrophy: incomplete  
857 suppression of a retrotransposed gene. *PLoS Genet* **6**: e1001181.

- 858 Splinter E, de Wit E, van de Werken HJ, Klous P, de Laat W. 2012. Determining long-range  
859 chromatin interactions for selected genomic sites using 4C-seq technology: from fixation to  
860 computation. *Methods* **58**: 221-230.
- 861 Statland JM, Tawil R. 2016. Facioscapulohumeral Muscular Dystrophy. *Continuum (Minneapolis Minn)*  
862 **22**: 1916-1931.
- 863 Subramanian A, Tamayo P, Mootha VK, Mukherjee S, Ebert BL, Gillette MA, Paulovich A,  
864 Pomeroy SL, Golub TR, Lander ES et al. 2005. Gene set enrichment analysis: a  
865 knowledge-based approach for interpreting genome-wide expression profiles. *Proc Natl*  
866 *Acad Sci U S A* **102**: 15545-15550.
- 867 Tam R, Smith KP, Lawrence JB. 2004. The 4q subtelomere harboring the FSHD locus is  
868 specifically anchored with peripheral heterochromatin unlike most human telomeres. *J Cell*  
869 *Biol* **167**: 269-279.
- 870 Tawil R, Storvick D, Feasby TE, Weiffenbach B, Griggs RC. 1993. Extreme variability of  
871 expression in monozygotic twins with FSH muscular dystrophy. *Neurology* **43**: 345-348.
- 872 Tawil R, Van Der Maarel SM. 2006. Facioscapulohumeral muscular dystrophy. *Muscle Nerve* **34**:  
873 1-15.
- 874 Trapnell C, Hendrickson DG, Sauvageau M, Goff L, Rinn JL, Pachter L. 2013. Differential analysis  
875 of gene regulation at transcript resolution with RNA-seq. *Nat Biotechnol* **31**: 46-53.
- 876 van Deutekom JC, Wijmenga C, van Tienhoven EA, Gruter AM, Hewitt JE, Padberg GW, van  
877 Ommen GJ, Hofker MH, Frants RR. 1993. FSHD associated DNA rearrangements are due  
878 to deletions of integral copies of a 3.2 kb tandemly repeated unit. *Hum Mol Genet* **2**: 2037-  
879 2042.
- 880 van Overveld PG, Lemmers RJ, Sandkuijl LA, Enthoven L, Winokur ST, Bakels F, Padberg GW,  
881 van Ommen GJ, Frants RR, van der Maarel SM. 2003. Hypomethylation of D4Z4 in 4q-  
882 linked and non-4q-linked facioscapulohumeral muscular dystrophy. *Nat Genet* **35**: 315-317.
- 883 Wang CY, Jegu T, Chu HP, Oh HJ, Lee JT. 2018. SMCHD1 Merges Chromosome Compartments  
884 and Assists Formation of Super-Structures on the Inactive X. *Cell* **174**: 406-421 e425.
- 885 Wijchers PJ, Geeven G, Eyres M, Bergsma AJ, Janssen M, Verstegen M, Zhu Y, Schell Y,  
886 Vermeulen C, de Wit E et al. 2015. Characterization and dynamics of pericentromere-  
887 associated domains in mice. *Genome Res* **25**: 958-969.
- 888 Woltering JM, Duboule D. 2015. Tetrapod axial evolution and developmental constraints; Empirical  
889 underpinning by a mouse model. *Mech Dev* **138 Pt 2**: 64-72.
- 890 Woltering JM, Noordermeer D, Leleu M, Duboule D. 2014. Conservation and divergence of  
891 regulatory strategies at Hox Loci and the origin of tetrapod digits. *PLoS Biol* **12**: e1001773.
- 892 Yao Z, Snider L, Balog J, Lemmers RJ, Van Der Maarel SM, Tawil R, Tapscott SJ. 2014. DUX4-  
893 induced gene expression is the major molecular signature in FSHD skeletal muscle. *Hum*  
894 *Mol Genet* **23**: 5342-5352.
- 895 Young JM, Whiddon JL, Yao Z, Kasinathan B, Snider L, Geng LN, Balog J, Tawil R, van der  
896 Maarel SM, Tapscott SJ. 2013. DUX4 binding to retroelements creates promoters that are  
897 active in FSHD muscle and testis. *PLoS Genet* **9**: e1003947.



- 898 Zeng W, de Greef JC, Chen YY, Chien R, Kong X, Gregson HC, Winokur ST, Pyle A, Robertson  
899 KD, Schmiesing JA et al. 2009. Specific loss of histone H3 lysine 9 trimethylation and  
900 HP1gamma/cohesin binding at D4Z4 repeats is associated with facioscapulohumeral  
901 dystrophy (FSHD). *PLoS Genet* **5**: e1000559.
- 902 Zheng M, Tian SZ, Capurso D, Kim M, Maurya R, Lee B, Piecuch E, Gong L, Zhu JJ, Li Z et al.  
903 2019. Multiplex chromatin interactions with single-molecule precision. *Nature* **566**: 558-562.
- 904

**A**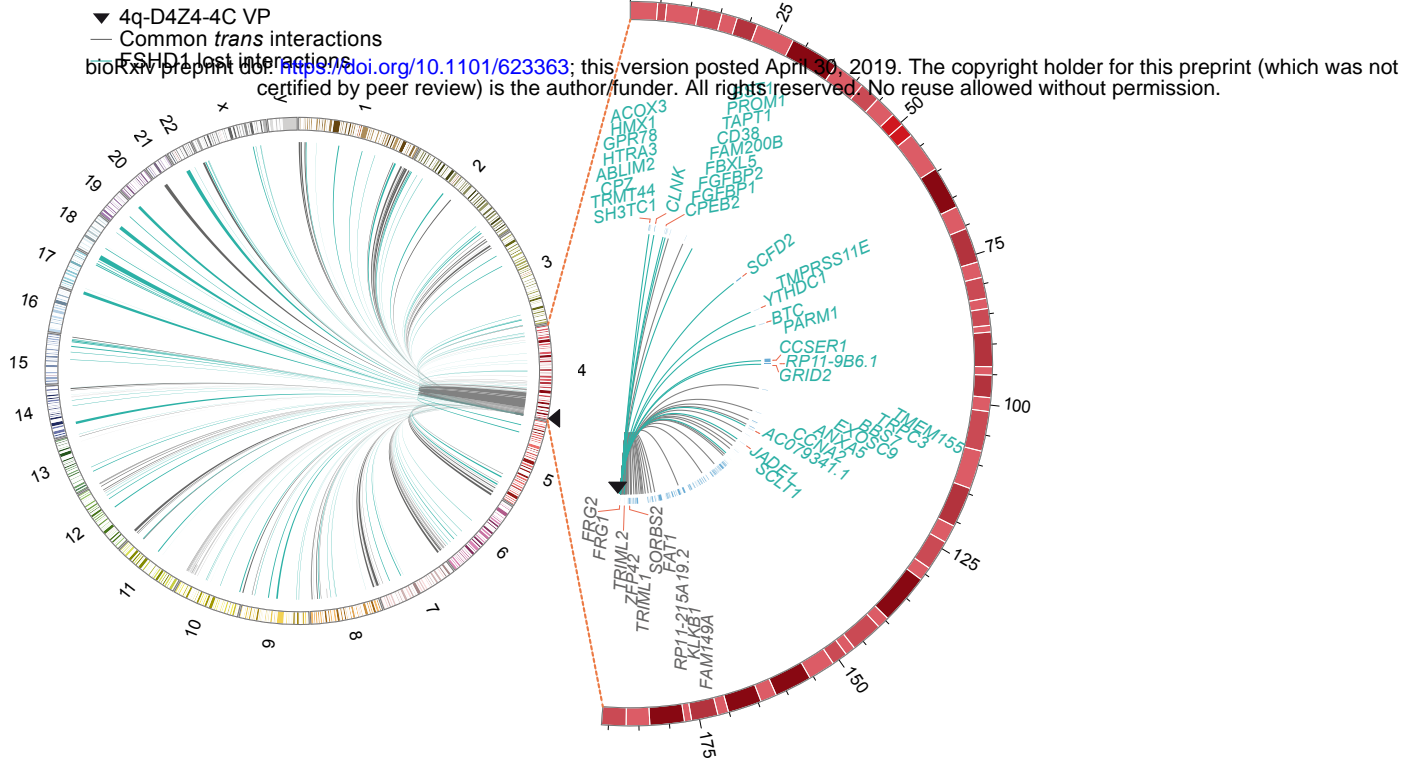**B**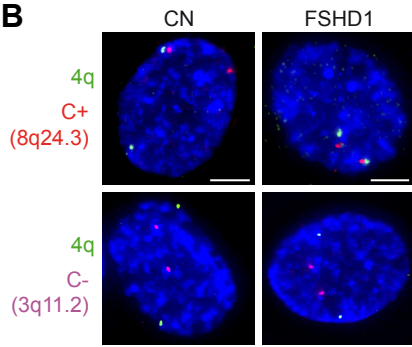**C**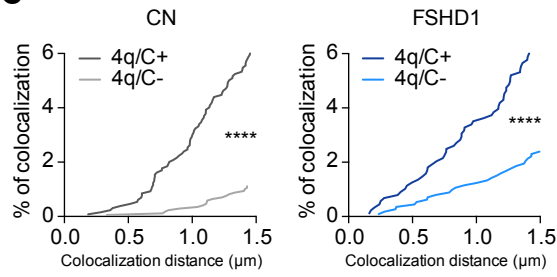**D**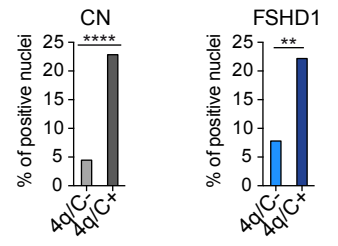

**A**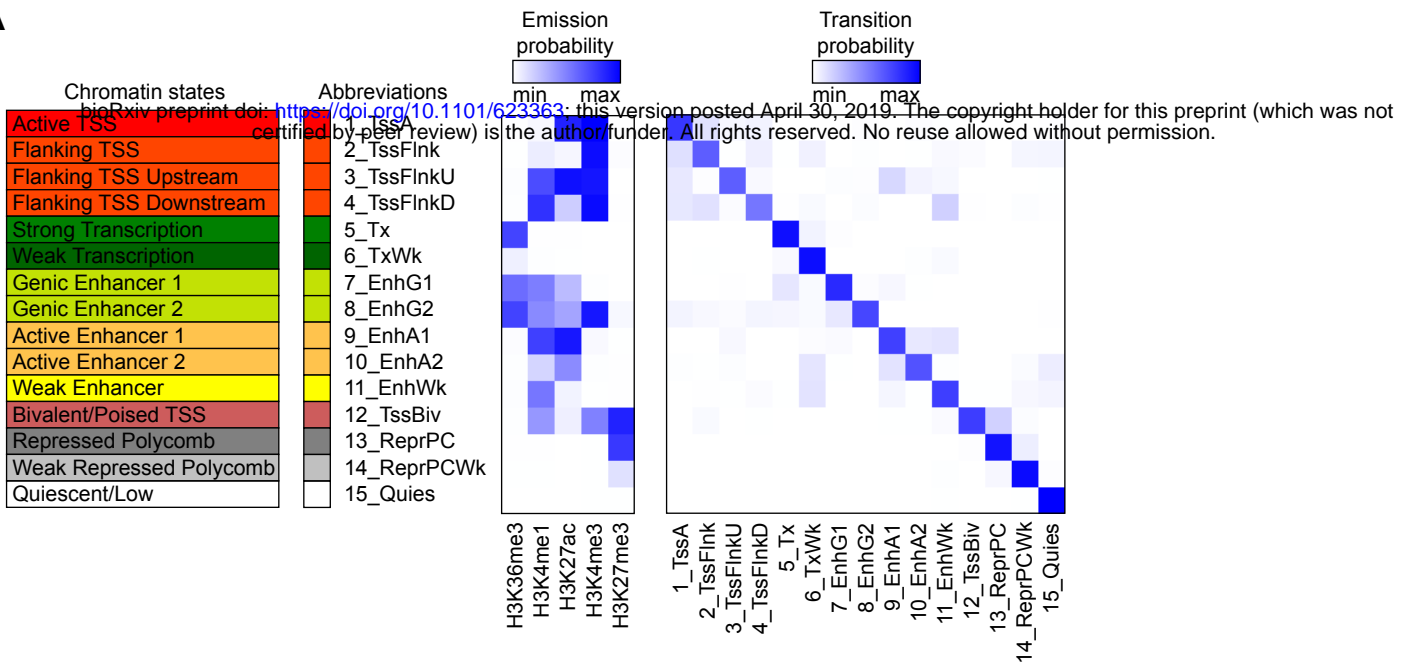**B**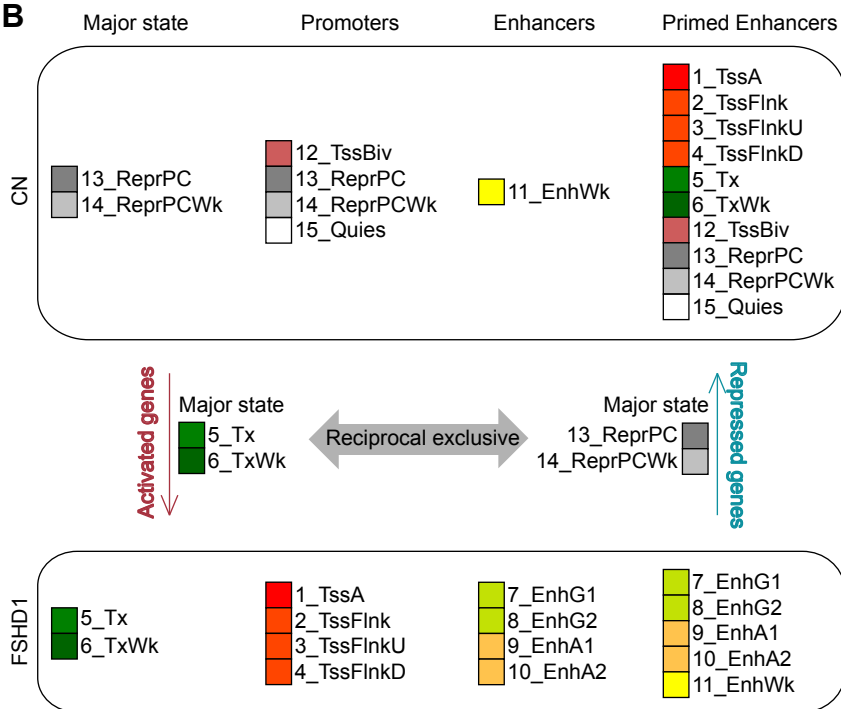**C**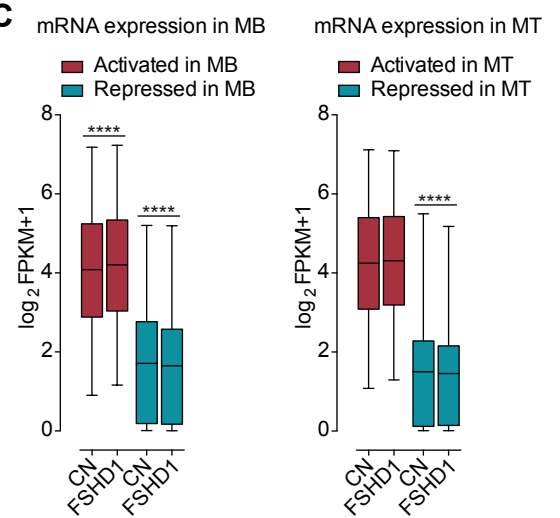

**A**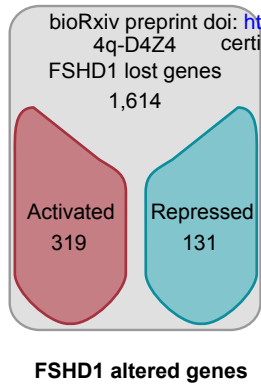**B**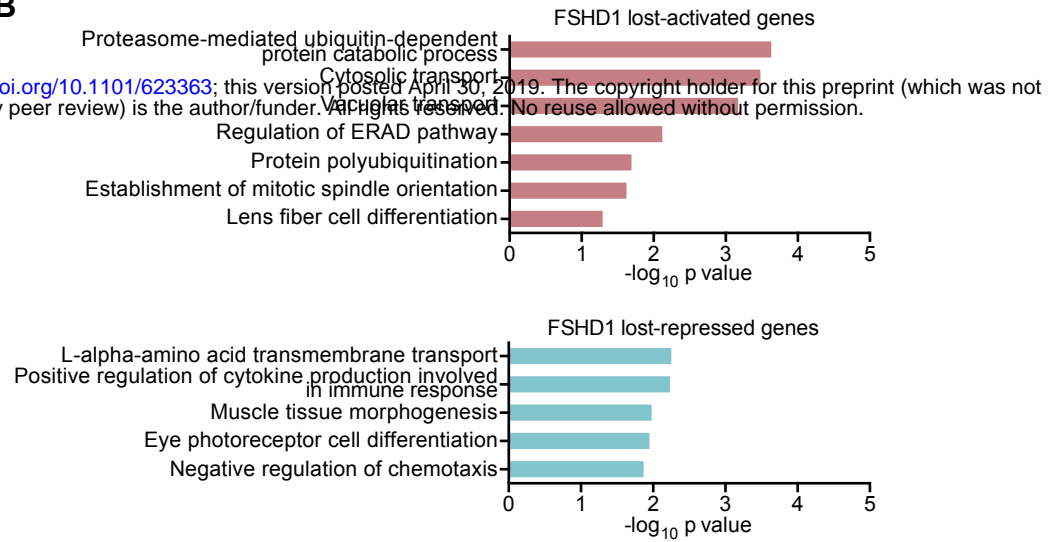**C**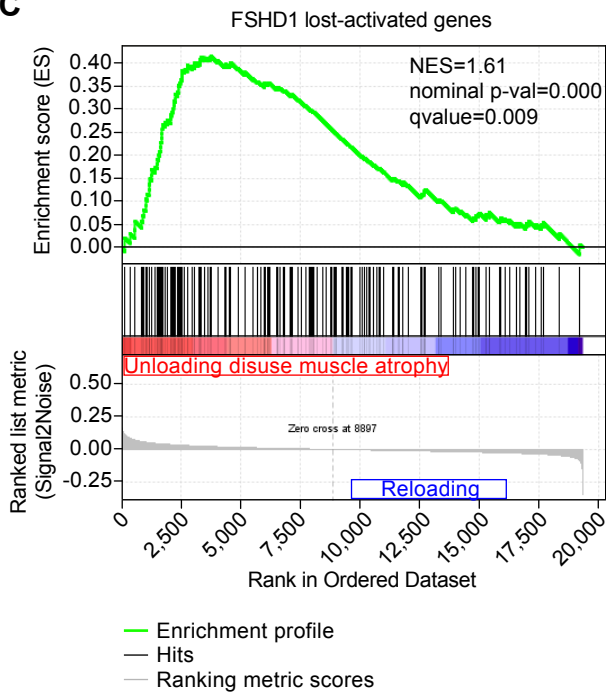**D**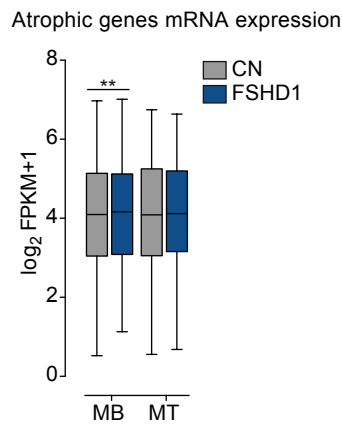**E**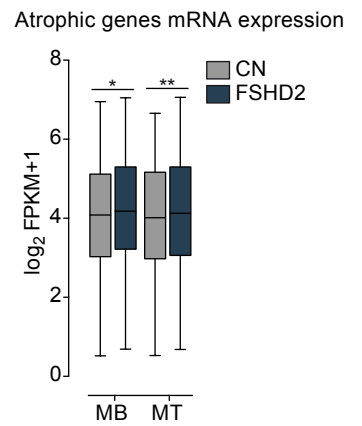

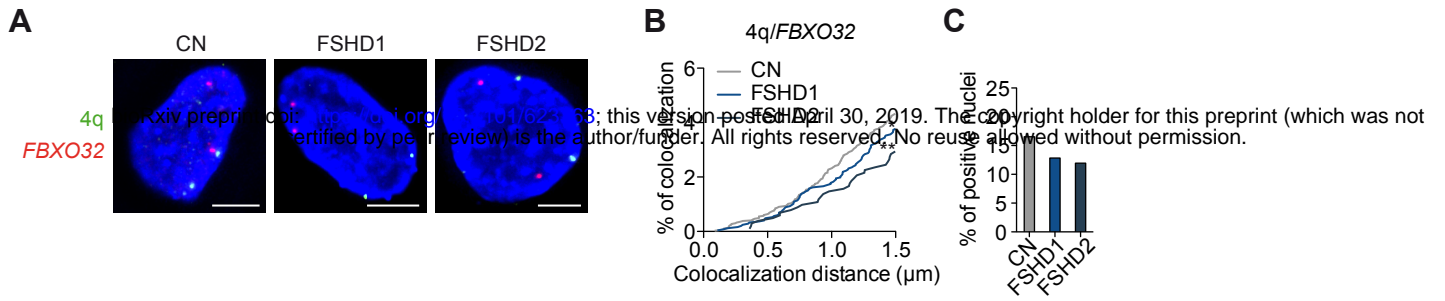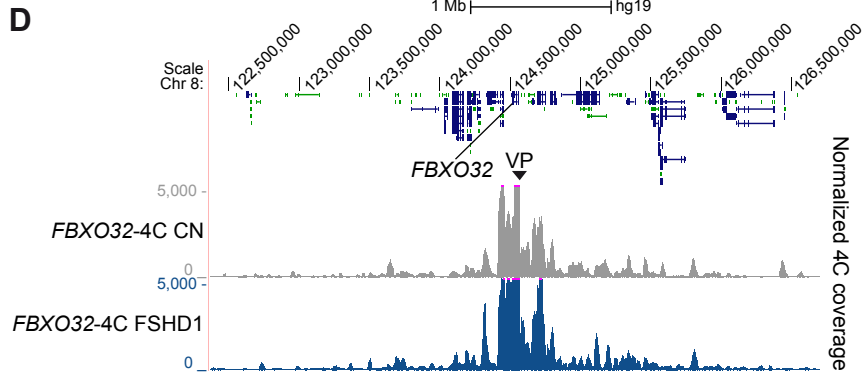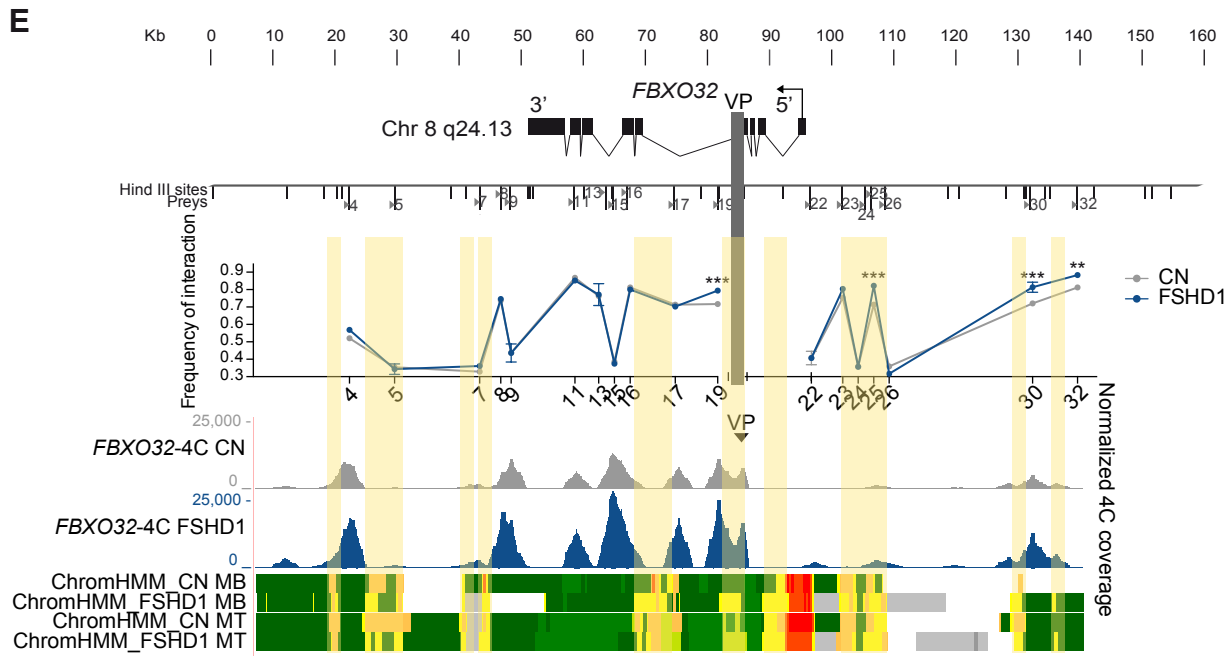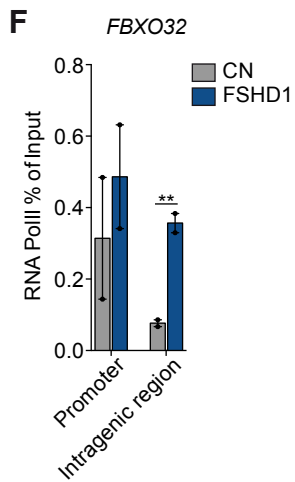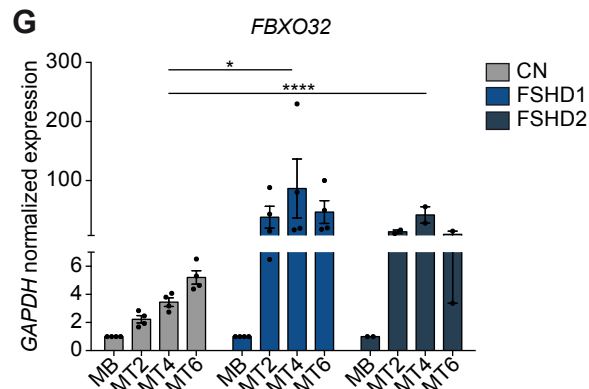

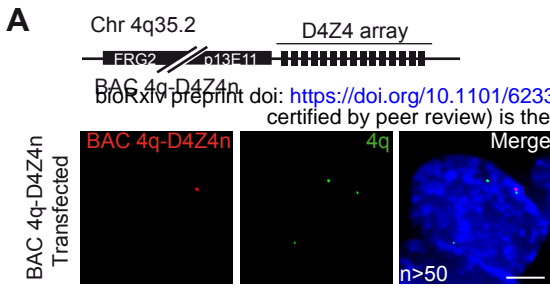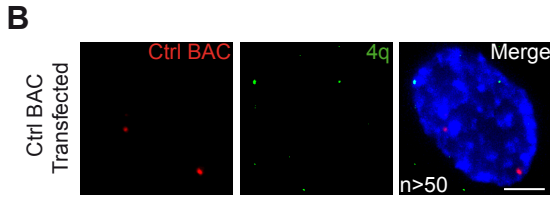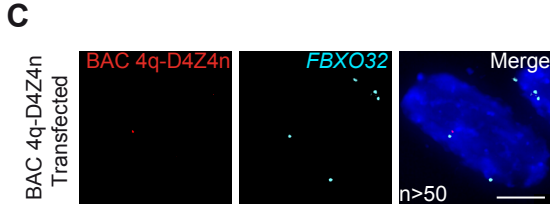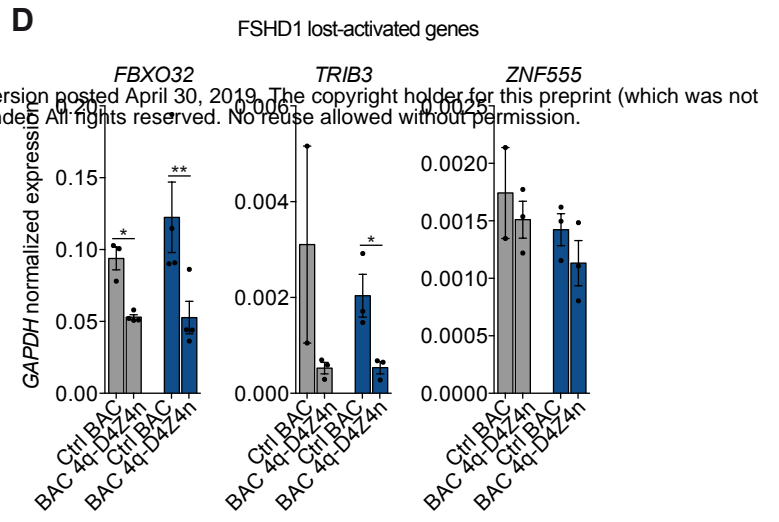

**E** FSHD1 lost-repressed gene

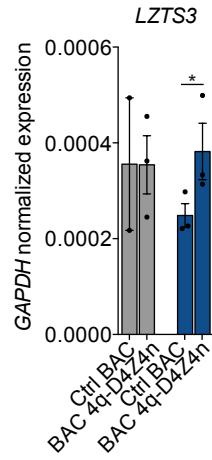

**F** Not interacting genes

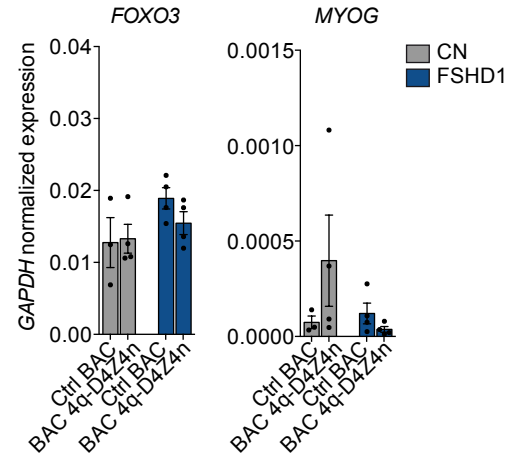

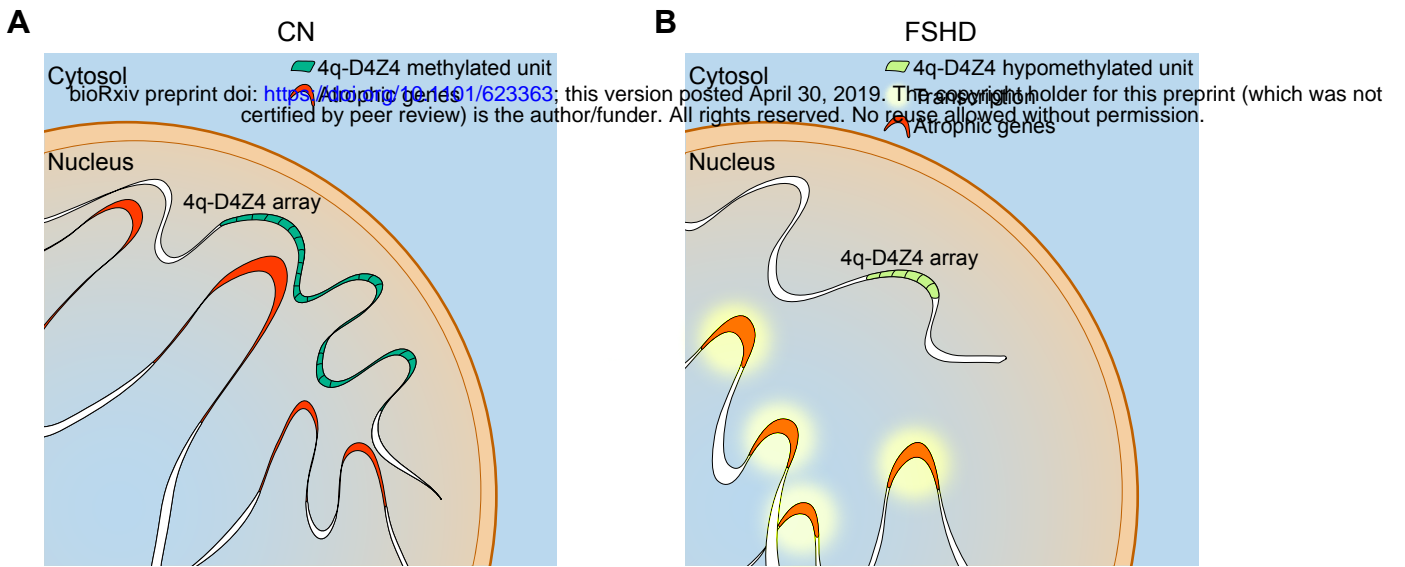

Source: http://biorxiv.org/content/10.1101/623363v1.full.pdf
